# Supplementary material
Source: PubMed Central journal article supplement (PMC4801288)

*Actiniscus pentasterias*  
Mar-May

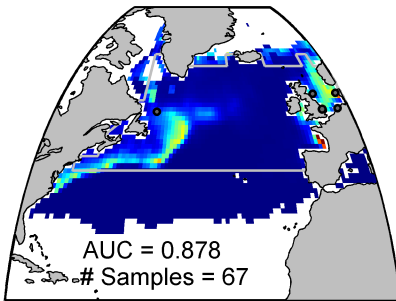

*Actiniscus pentasterias*  
Jun-Aug

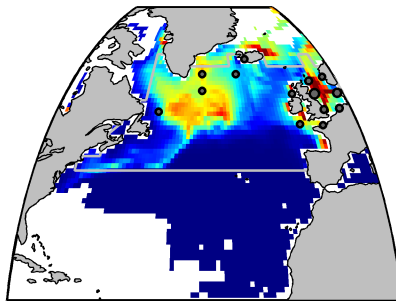

*Actiniscus pentasterias*  
Sep-Nov

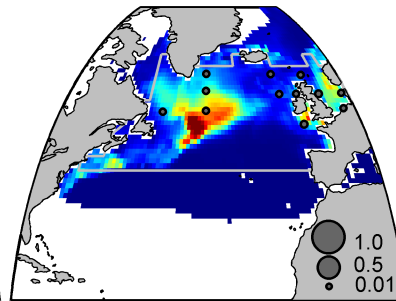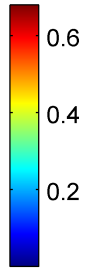

*Actinoptychus* spp  
Mar-May

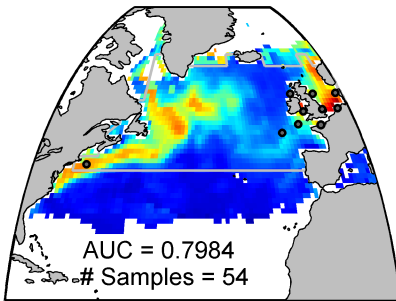

*Actinoptychus* spp  
Jun-Aug

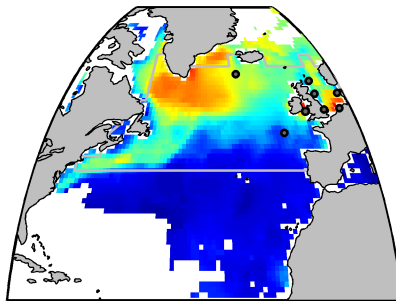

*Actinoptychus* spp  
Sep-Nov

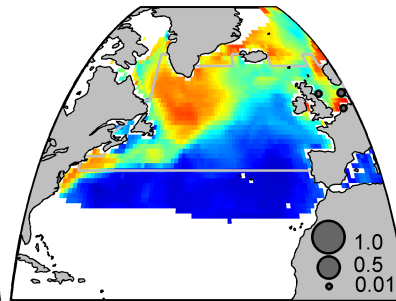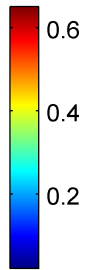

*Asterionella glacialis*  
Mar-May

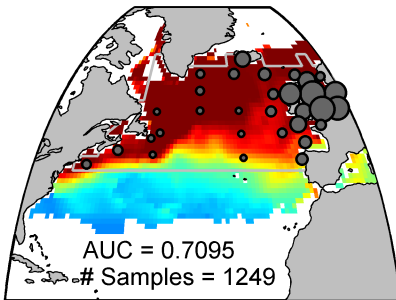

*Asterionella glacialis*  
Jun-Aug

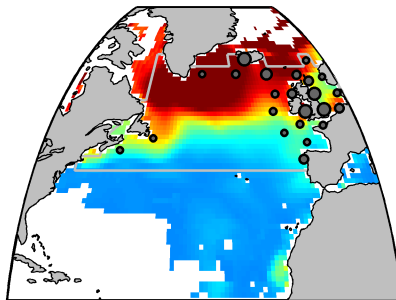

*Asterionella glacialis*  
Sep-Nov

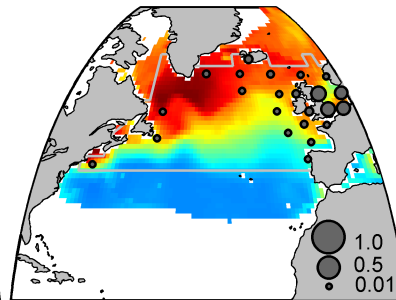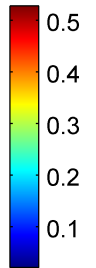

Asteromphalus spp  
Mar-May

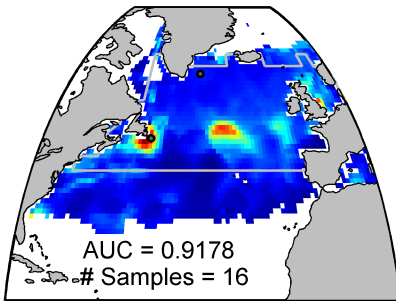

Asteromphalus spp  
Jun-Aug

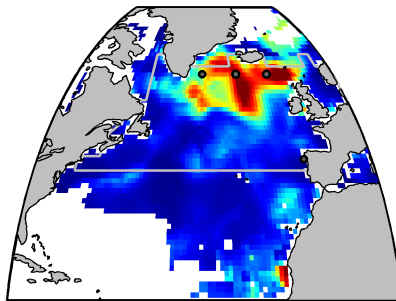

Asteromphalus spp  
Sep-Nov

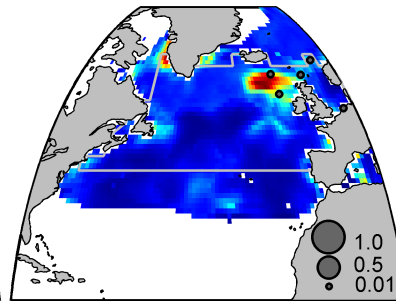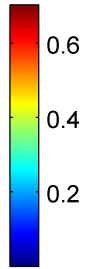

Bacillaria paxillifer  
Mar-May

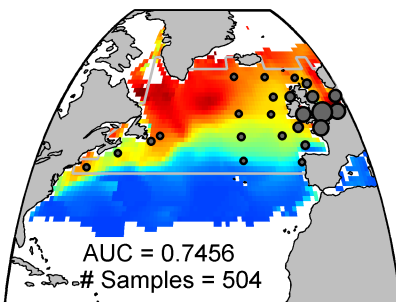

Bacillaria paxillifer  
Jun-Aug

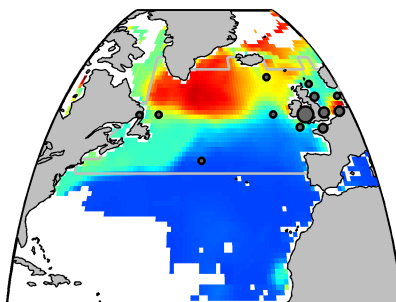

Bacillaria paxillifer  
Sep-Nov

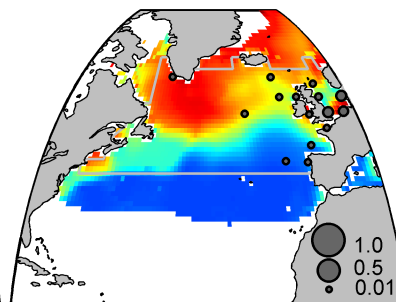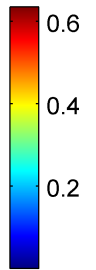

Bacteriastrium spp  
Mar-May

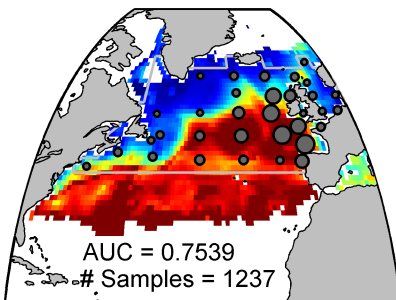

Bacteriastrium spp  
Jun-Aug

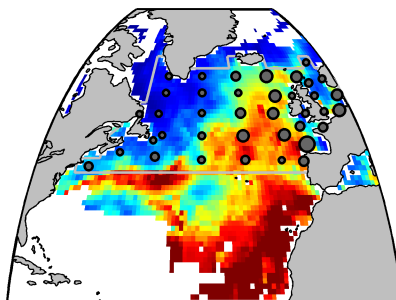

Bacteriastrium spp  
Sep-Nov

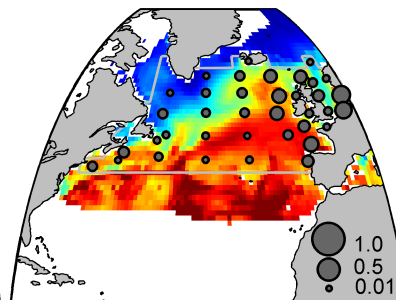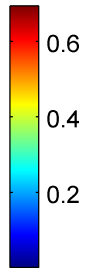

*Bellerrochea malleus*  
Mar-May

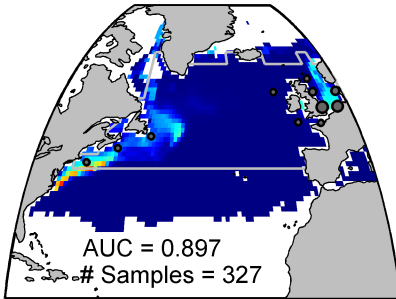

*Bellerrochea malleus*  
Jun-Aug

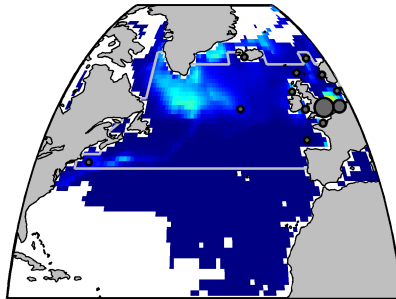

*Bellerrochea malleus*  
Sep-Nov

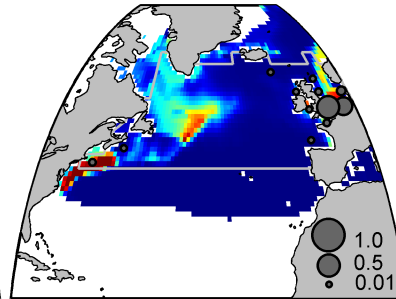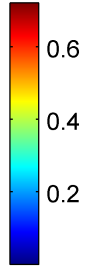

*Biddulphia alternans*  
Mar-May

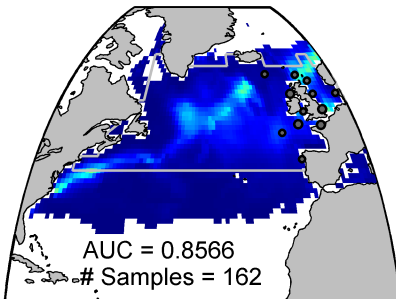

*Biddulphia alternans*  
Jun-Aug

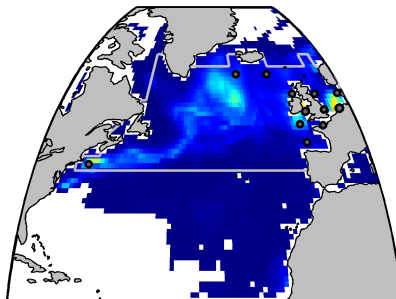

*Biddulphia alternans*  
Sep-Nov

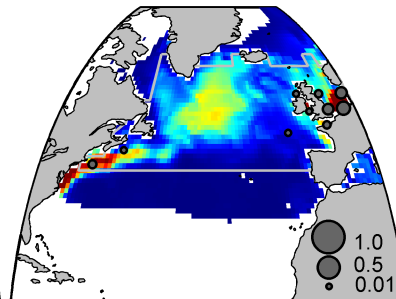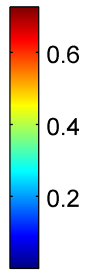

*Cerataulina pelagica*  
Mar-May

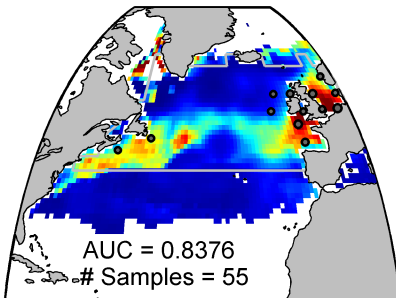

*Cerataulina pelagica*  
Jun-Aug

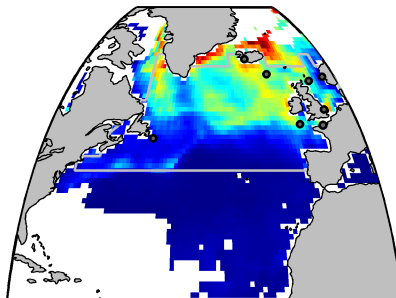

*Cerataulina pelagica*  
Sep-Nov

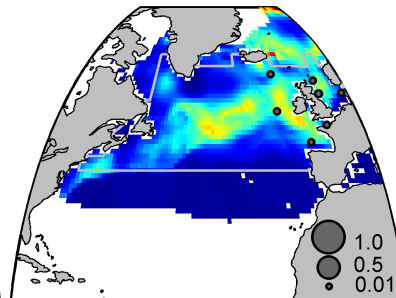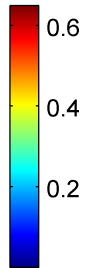

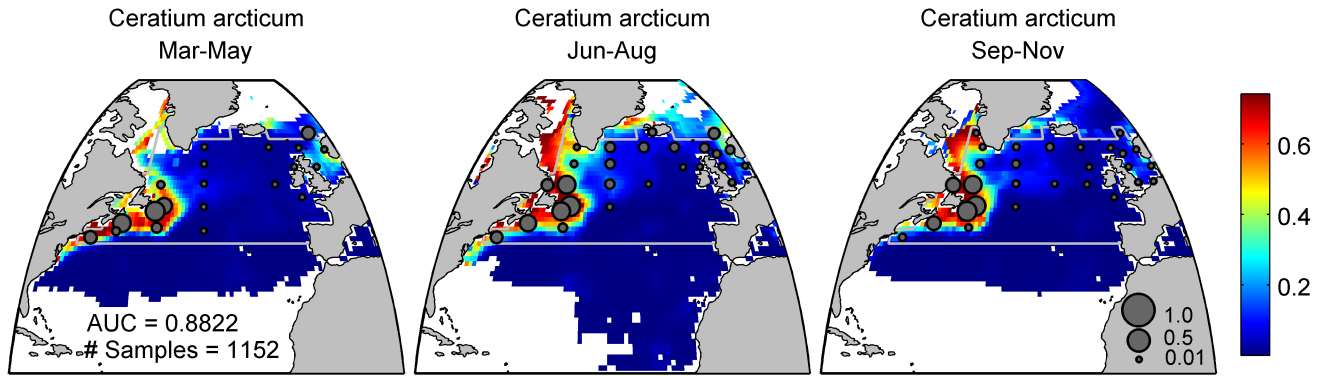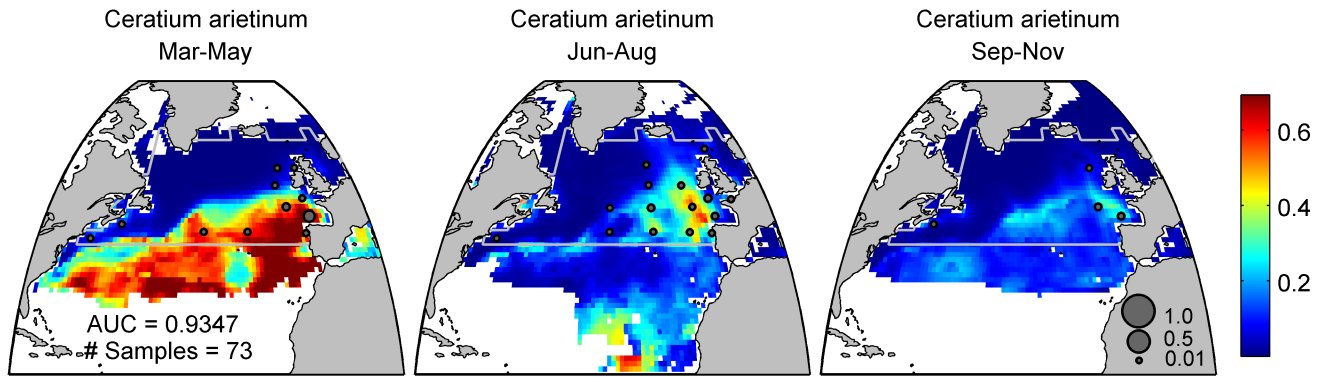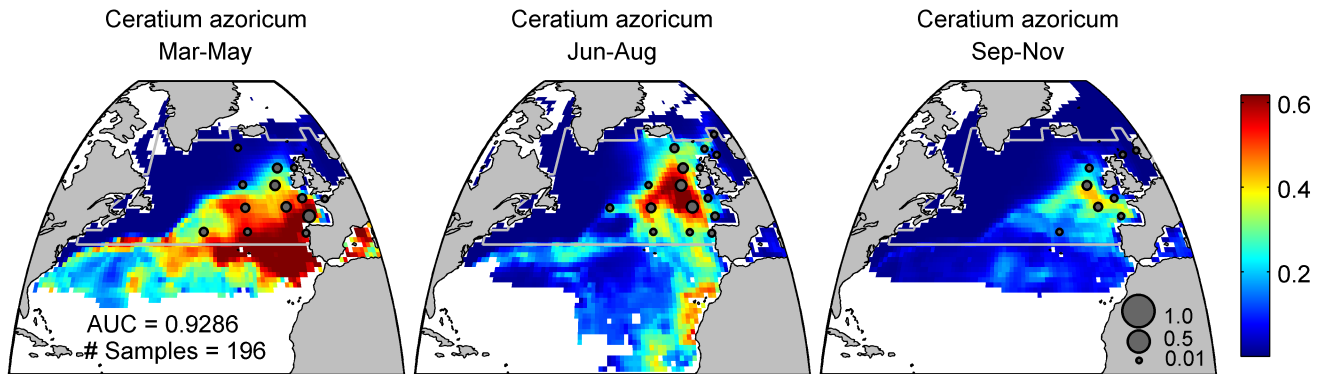

*Ceratium bucephalum*  
Mar-May

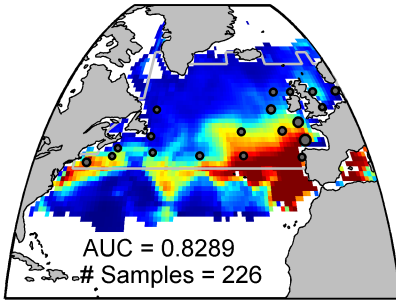

*Ceratium bucephalum*  
Jun-Aug

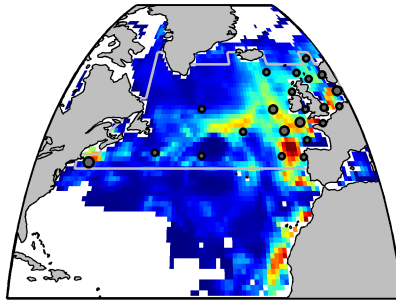

*Ceratium bucephalum*  
Sep-Nov

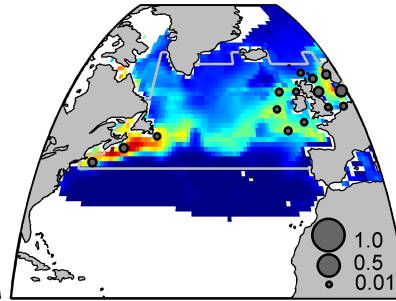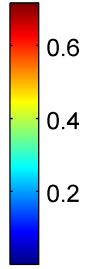

*Ceratium candelabrum*  
Mar-May

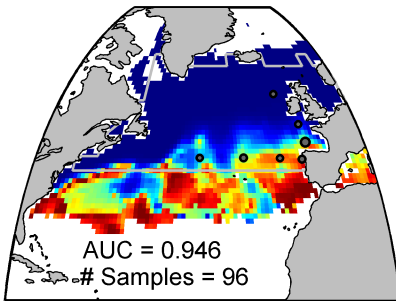

*Ceratium candelabrum*  
Jun-Aug

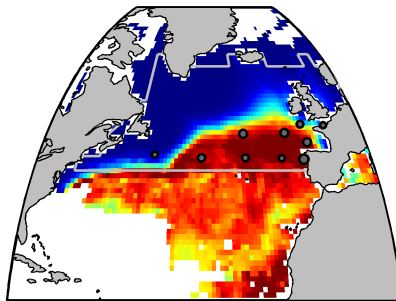

*Ceratium candelabrum*  
Sep-Nov

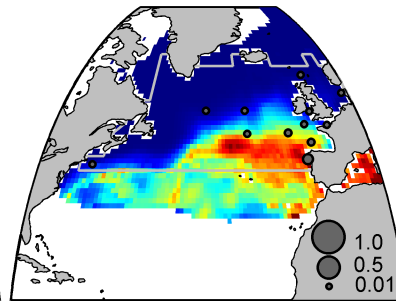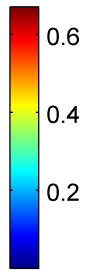

*Ceratium carriense*  
Mar-May

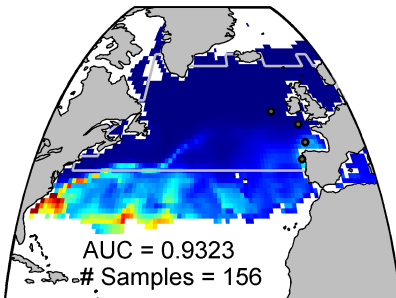

*Ceratium carriense*  
Jun-Aug

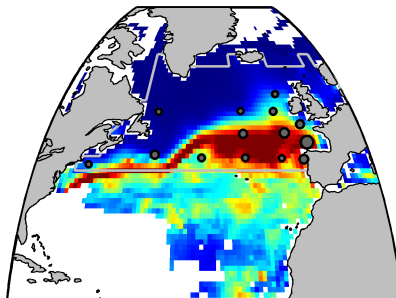

*Ceratium carriense*  
Sep-Nov

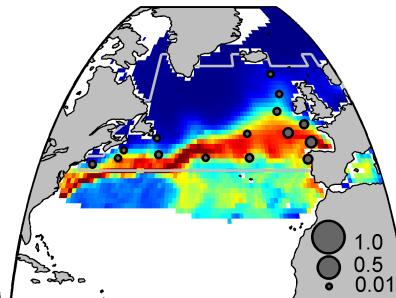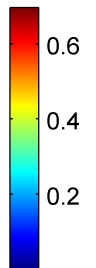

Ceratium compressum  
Mar-May

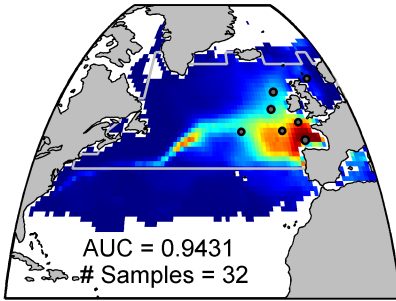

Ceratium compressum  
Jun-Aug

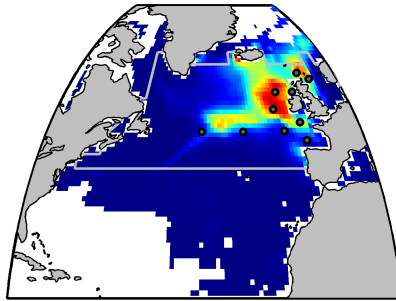

Ceratium compressum  
Sep-Nov

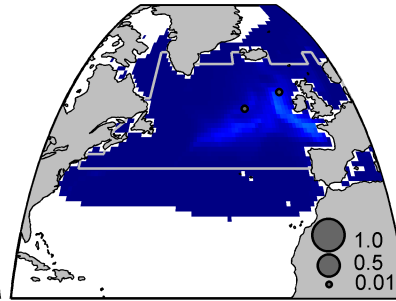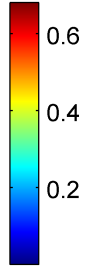

Ceratium declinatum  
Mar-May

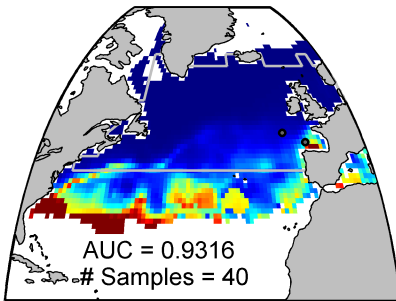

Ceratium declinatum  
Jun-Aug

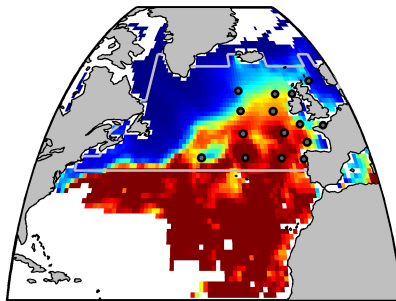

Ceratium declinatum  
Sep-Nov

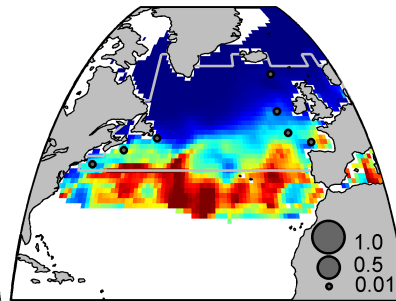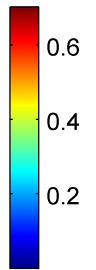

Ceratium extensum  
Mar-May

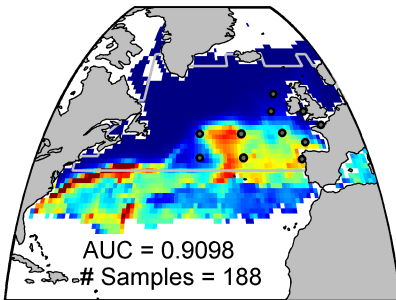

Ceratium extensum  
Jun-Aug

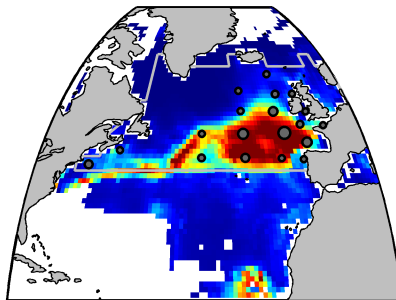

Ceratium extensum  
Sep-Nov

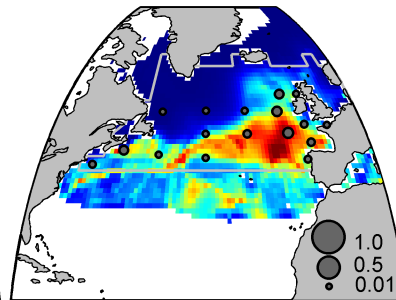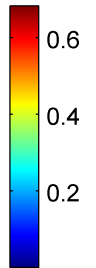

*Ceratium gibberum*  
Mar-May

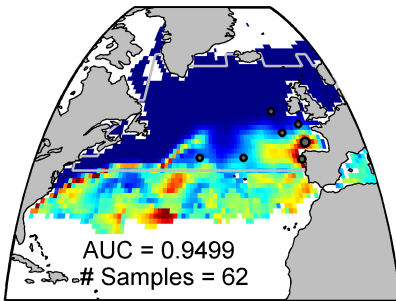

*Ceratium gibberum*  
Jun-Aug

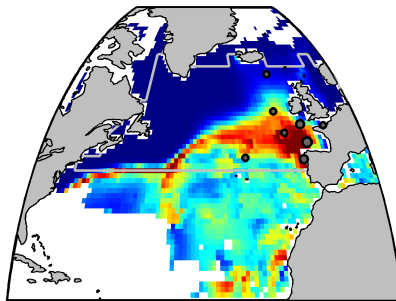

*Ceratium gibberum*  
Sep-Nov

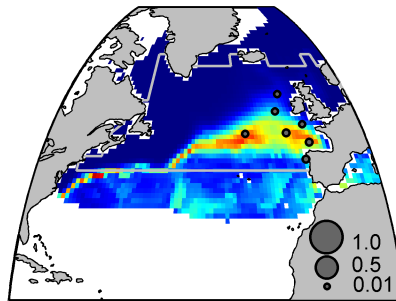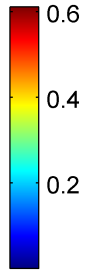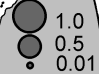

*Ceratium hexacanthum*  
Mar-May

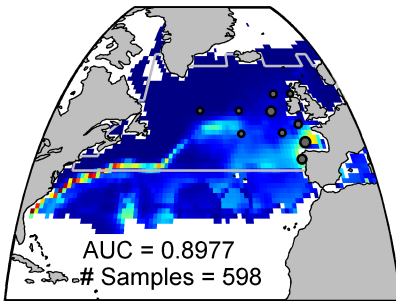

*Ceratium hexacanthum*  
Jun-Aug

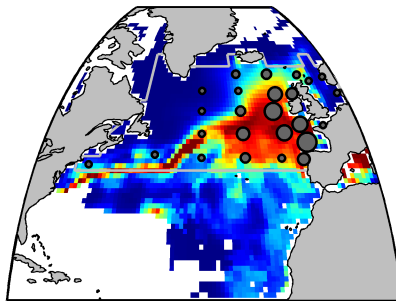

*Ceratium hexacanthum*  
Sep-Nov

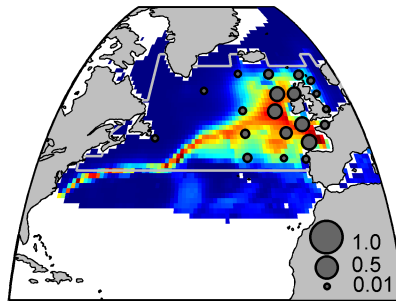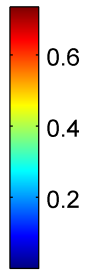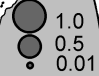

*Ceratium lineatum*  
Mar-May

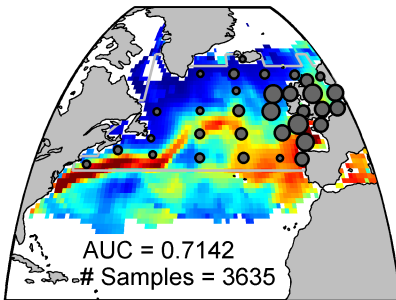

*Ceratium lineatum*  
Jun-Aug

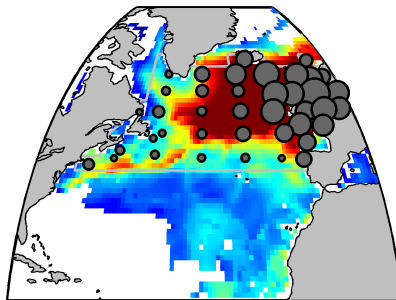

*Ceratium lineatum*  
Sep-Nov

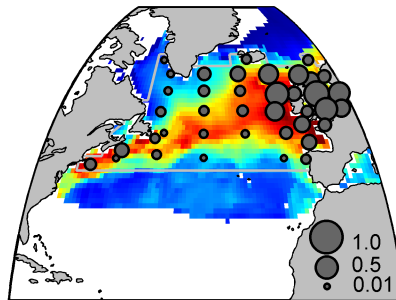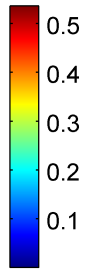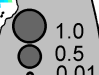

*Ceratium longipes*  
Mar-May

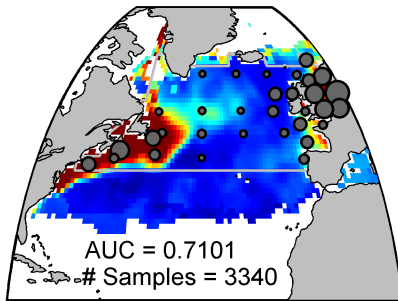

*Ceratium longipes*  
Jun-Aug

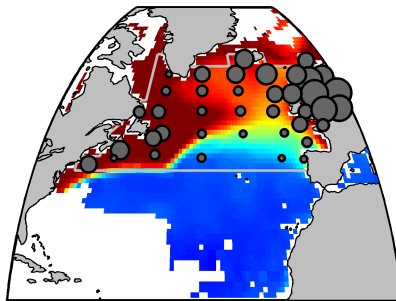

*Ceratium longipes*  
Sep-Nov

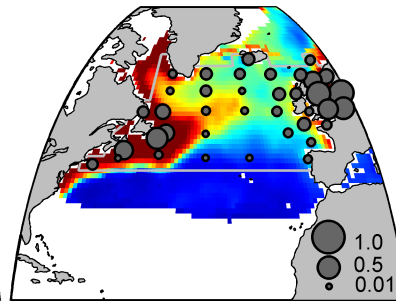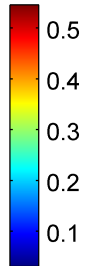

*Ceratium massiliense*  
Mar-May

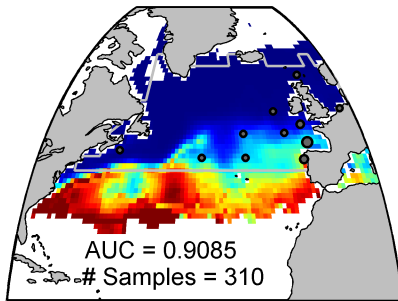

*Ceratium massiliense*  
Jun-Aug

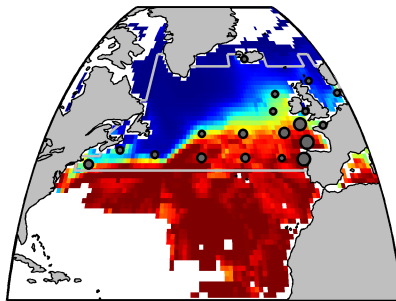

*Ceratium massiliense*  
Sep-Nov

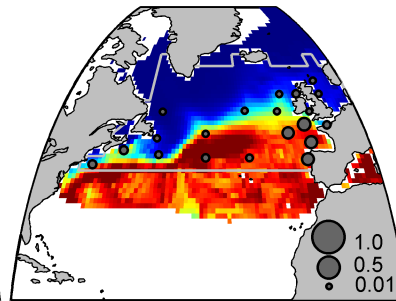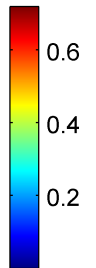

*Ceratium minutum*  
Mar-May

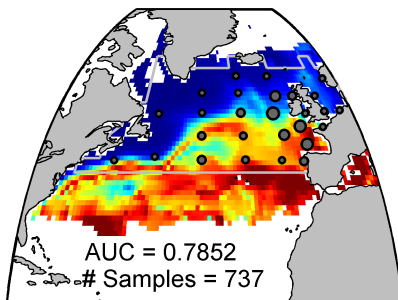

*Ceratium minutum*  
Jun-Aug

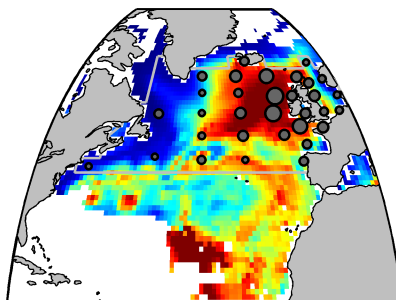

*Ceratium minutum*  
Sep-Nov

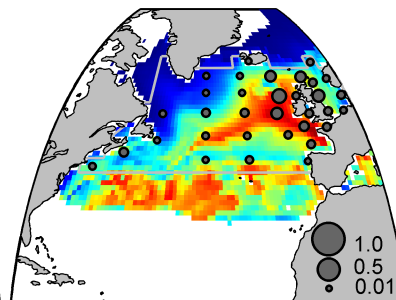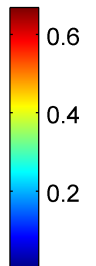



*Ceratium pentagonum*  
Mar-May

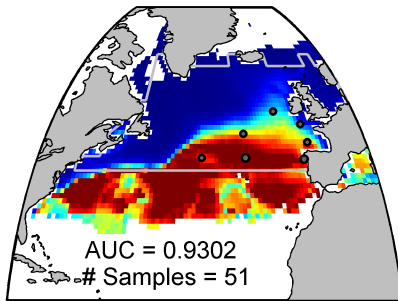

*Ceratium pentagonum*  
Jun-Aug

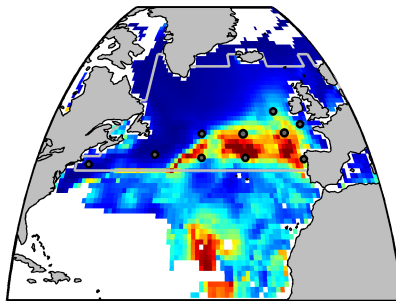

*Ceratium pentagonum*  
Sep-Nov

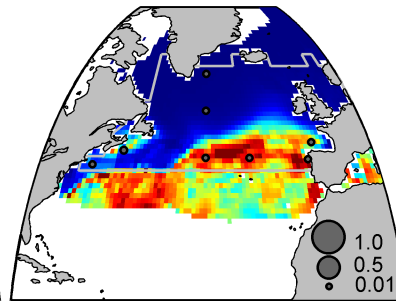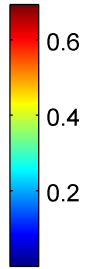

*Ceratium platycorne*  
Mar-May

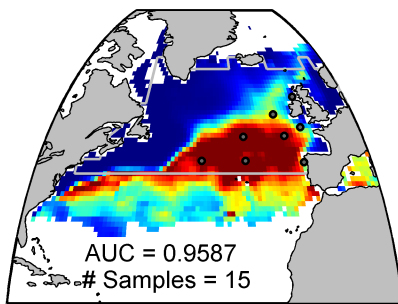

*Ceratium platycorne*  
Jun-Aug

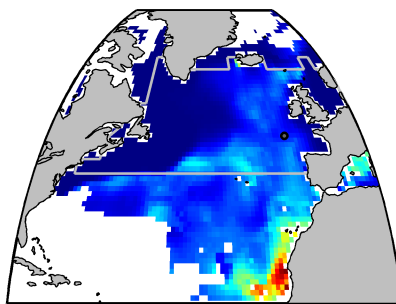

*Ceratium platycorne*  
Sep-Nov

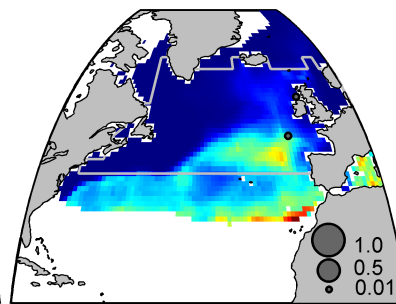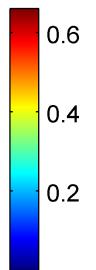

*Ceratium teres*  
Mar-May

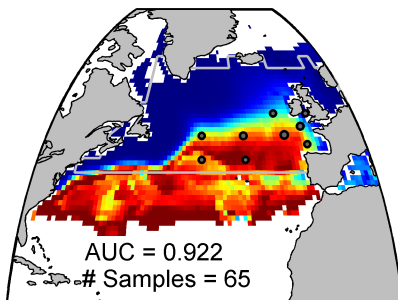

*Ceratium teres*  
Jun-Aug

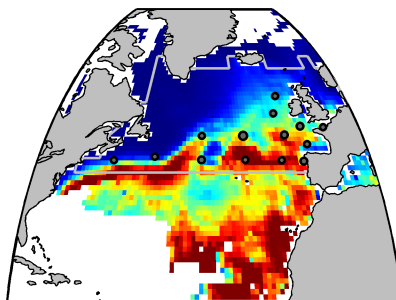

*Ceratium teres*  
Sep-Nov

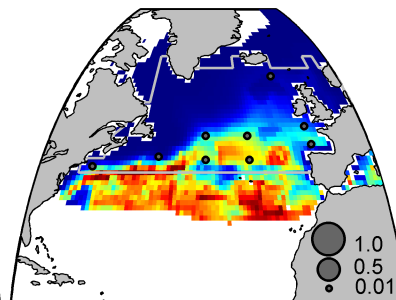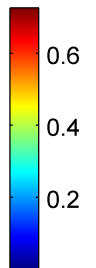

*Ceratium trichoceros*  
Mar-May

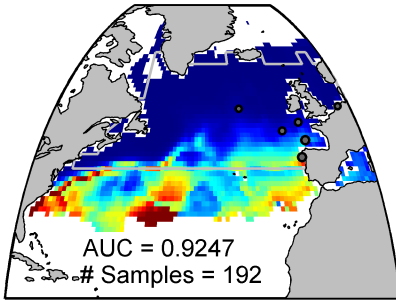

*Ceratium trichoceros*  
Jun-Aug

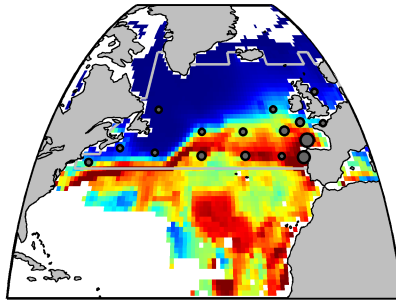

*Ceratium trichoceros*  
Sep-Nov

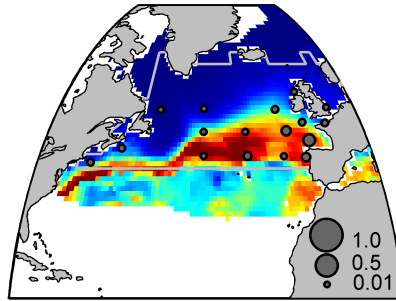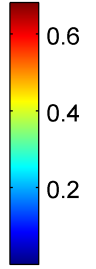

*Ceratium vultur*  
Mar-May

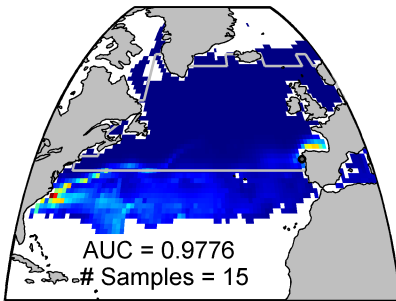

*Ceratium vultur*  
Jun-Aug

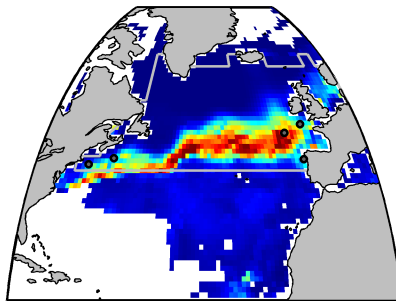

*Ceratium vultur*  
Sep-Nov

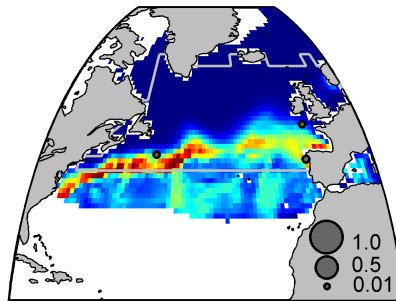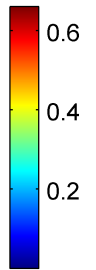

*Cladopyxis* spp  
Mar-May

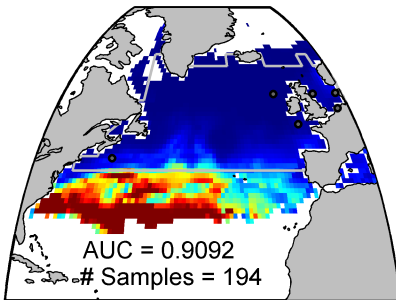

*Cladopyxis* spp  
Jun-Aug

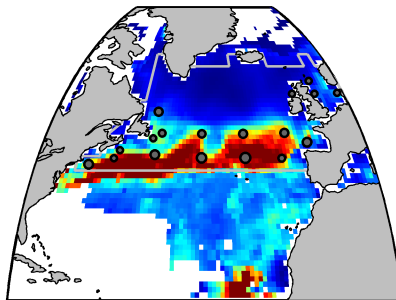

*Cladopyxis* spp  
Sep-Nov

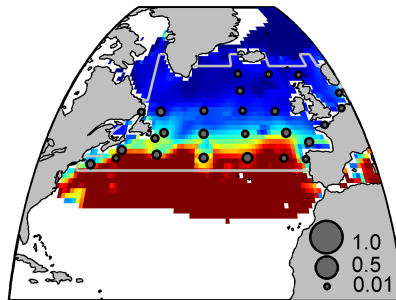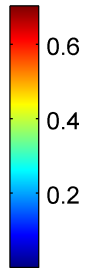

*Coscinodiscus concinnus*  
Mar-May

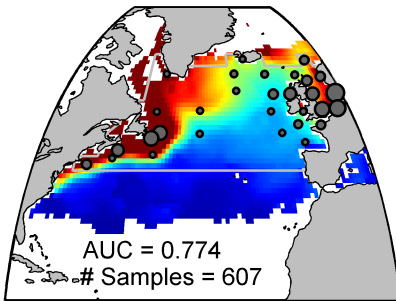

*Coscinodiscus concinnus*  
Jun-Aug

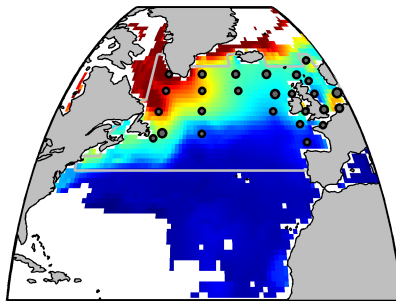

*Coscinodiscus concinnus*  
Sep-Nov

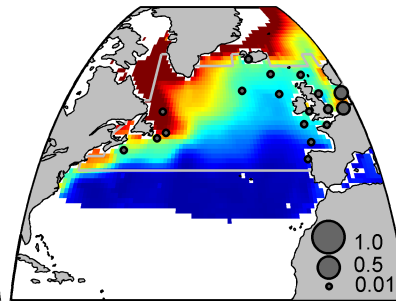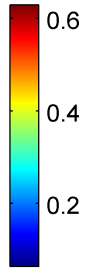

*Coscinodiscus walesii*  
Mar-May

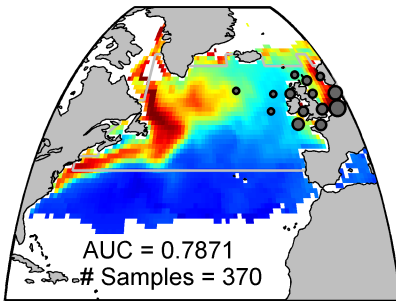

*Coscinodiscus walesii*  
Jun-Aug

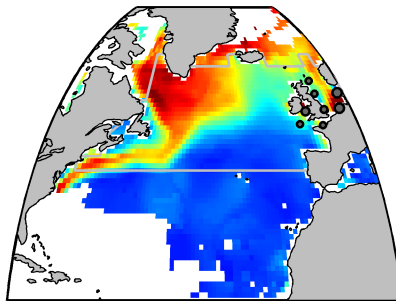

*Coscinodiscus walesii*  
Sep-Nov

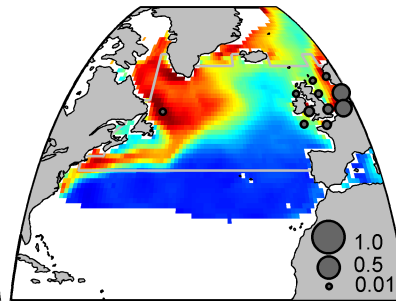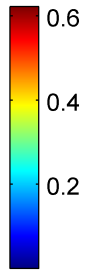

*Dactyliosolen antarcticus*  
Mar-May

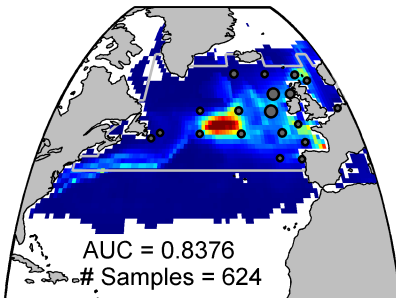

*Dactyliosolen antarcticus*  
Jun-Aug

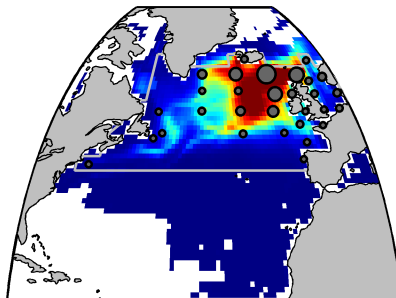

*Dactyliosolen antarcticus*  
Sep-Nov

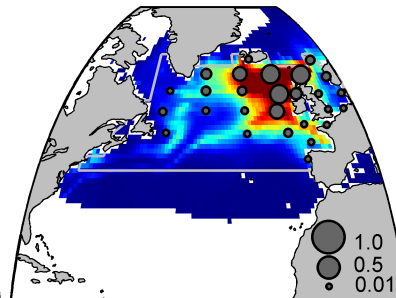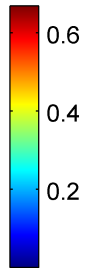

*Dactyliosolen mediterraneus*  
Mar-May

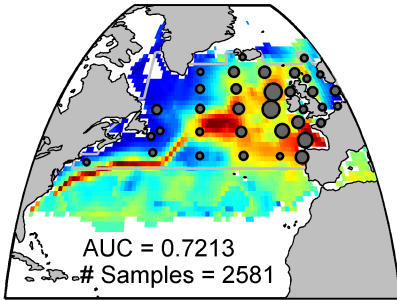

*Dactyliosolen mediterraneus*  
Jun-Aug

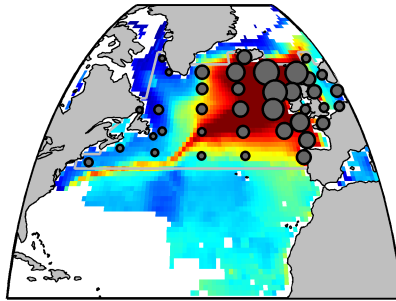

*Dactyliosolen mediterraneus*  
Sep-Nov

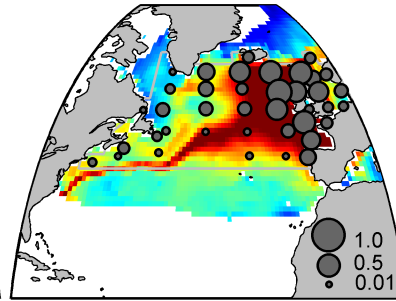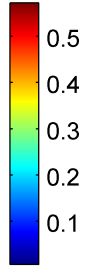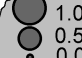

*Detonula confervacea*  
Mar-May

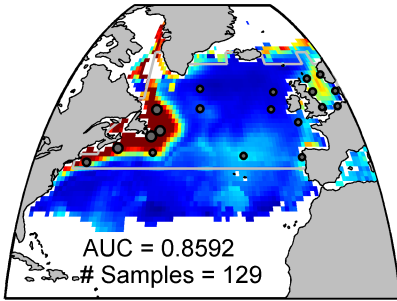

*Detonula confervacea*  
Jun-Aug

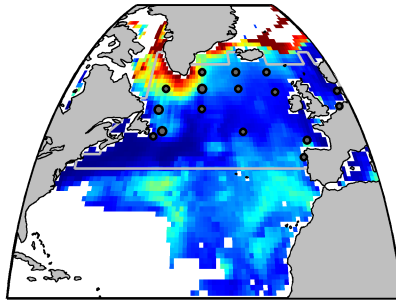

*Detonula confervacea*  
Sep-Nov

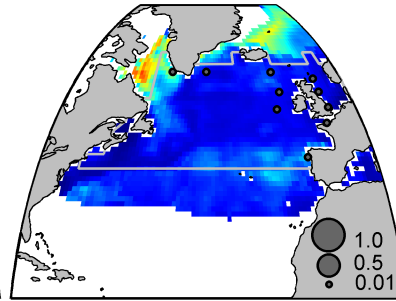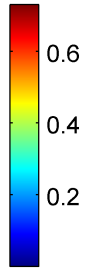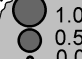

*Dinophysis acuminta*  
Mar-May

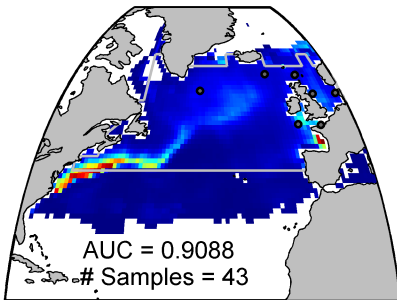

*Dinophysis acuminta*  
Jun-Aug

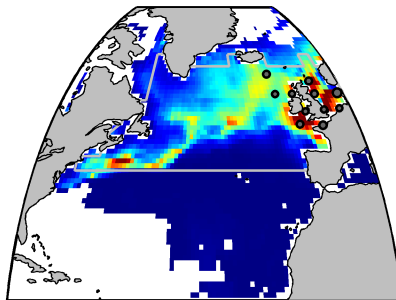

*Dinophysis acuminta*  
Sep-Nov

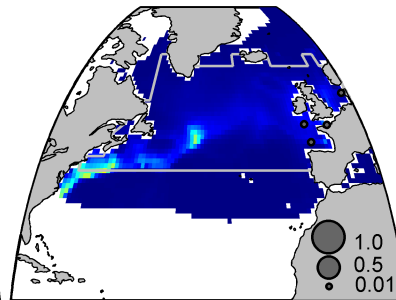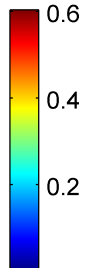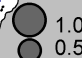

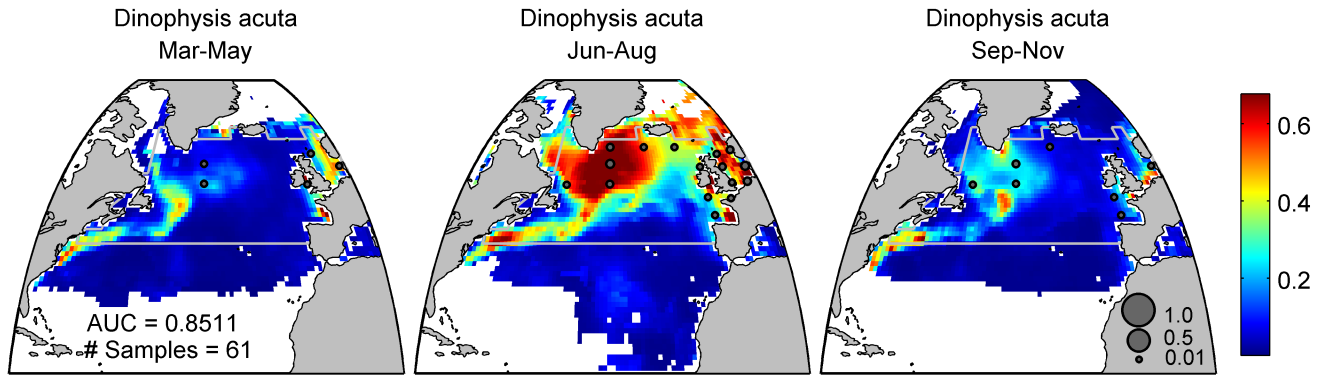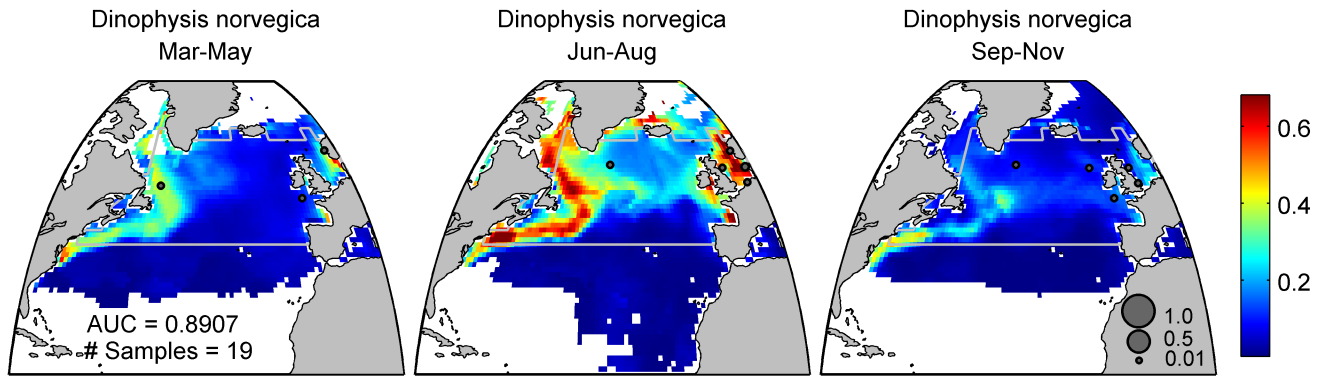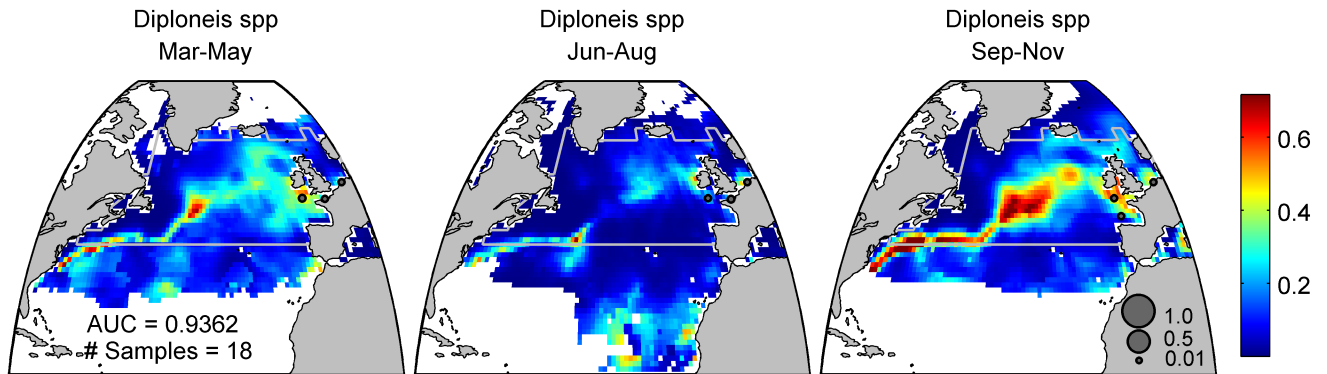

*Ditylum brightwellii*  
Mar-May

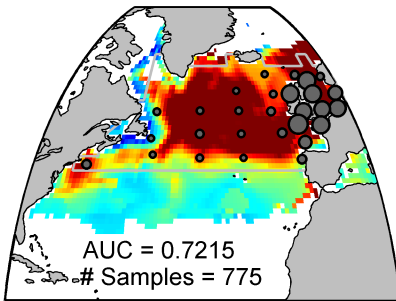

*Ditylum brightwellii*  
Jun-Aug

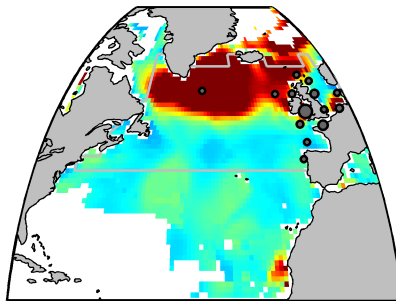

*Ditylum brightwellii*  
Sep-Nov

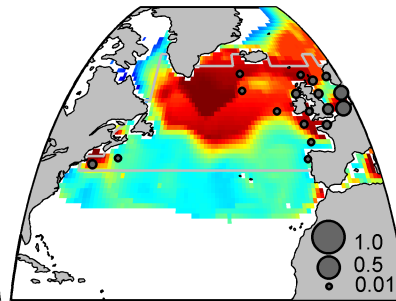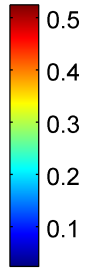

*Eucampia zodiacus*  
Mar-May

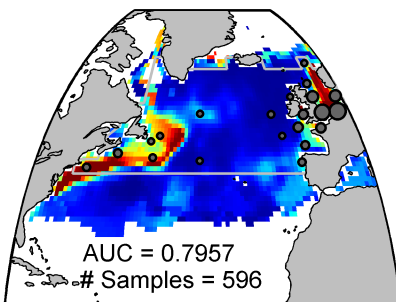

*Eucampia zodiacus*  
Jun-Aug

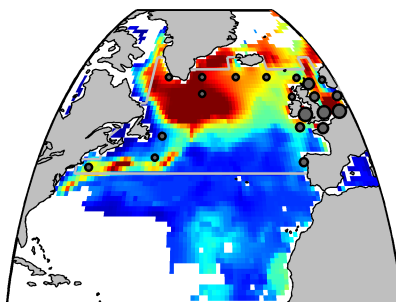

*Eucampia zodiacus*  
Sep-Nov

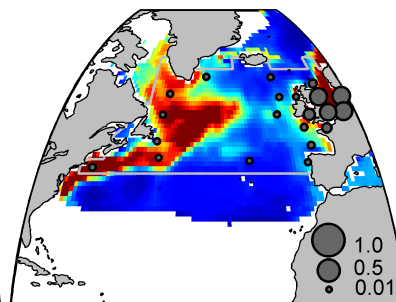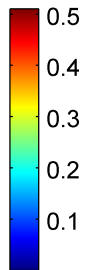

*Exuviaella* spp  
Mar-May

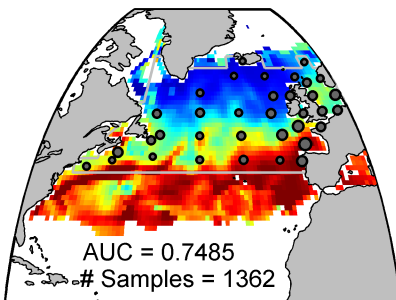

*Exuviaella* spp  
Jun-Aug

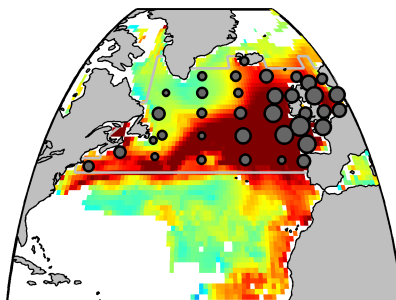

*Exuviaella* spp  
Sep-Nov

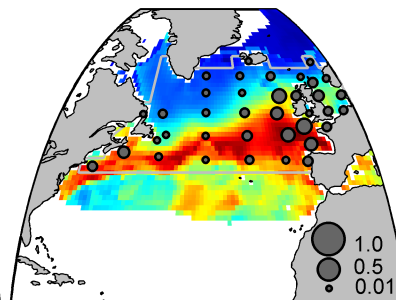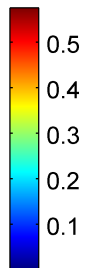

Fragilaria spp  
Mar-May

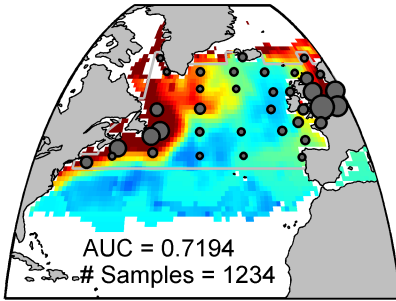

Fragilaria spp  
Jun-Aug

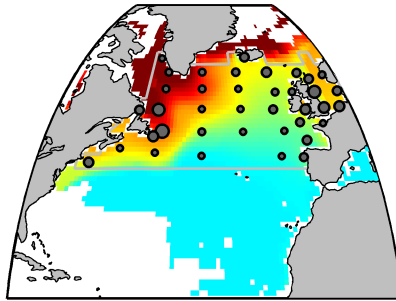

Fragilaria spp  
Sep-Nov

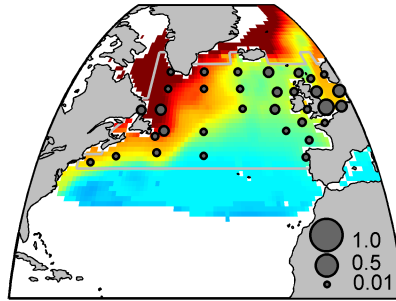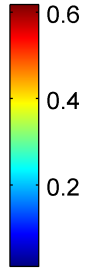

Glenodinium spp  
Mar-May

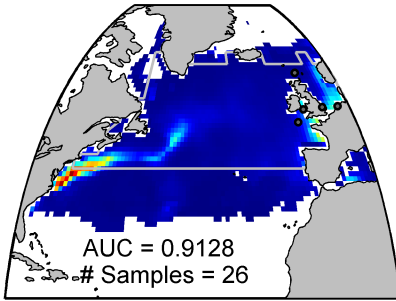

Glenodinium spp  
Jun-Aug

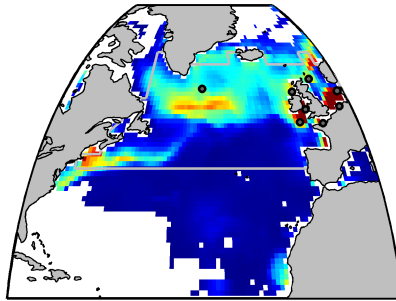

Glenodinium spp  
Sep-Nov

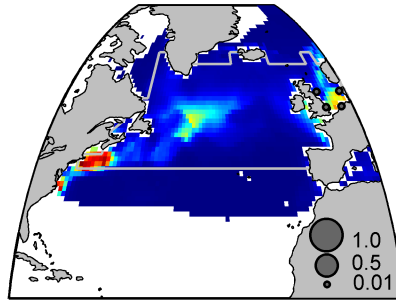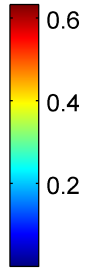

Gonyaulax spp  
Mar-May

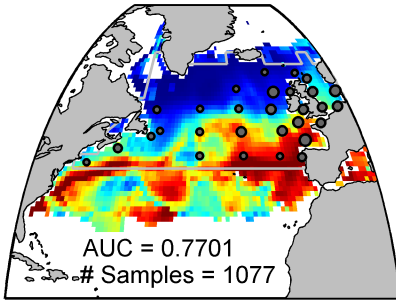

Gonyaulax spp  
Jun-Aug

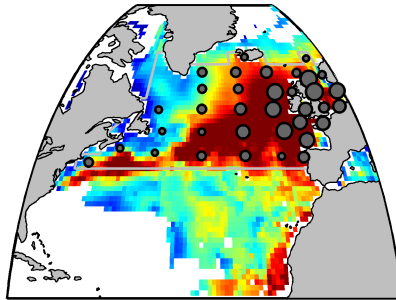

Gonyaulax spp  
Sep-Nov

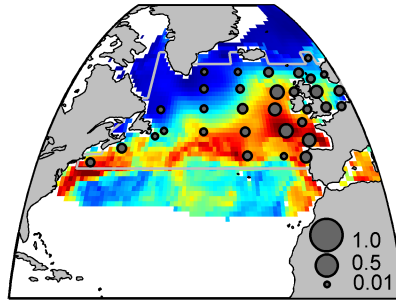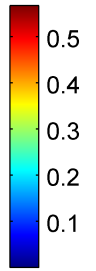

Guinardia flaccida  
Mar-May

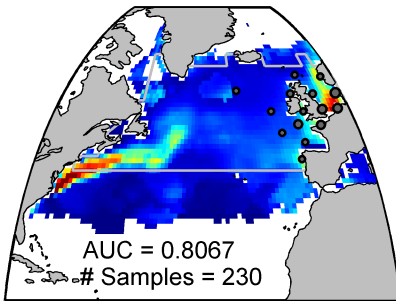

Guinardia flaccida  
Jun-Aug

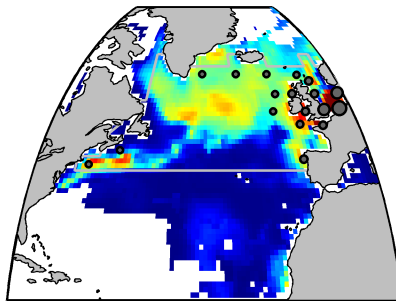

Guinardia flaccida  
Sep-Nov

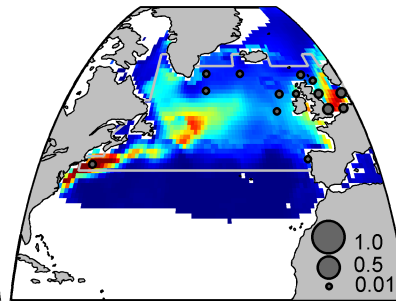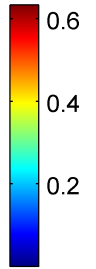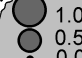

Gyrodinium spp  
Mar-May

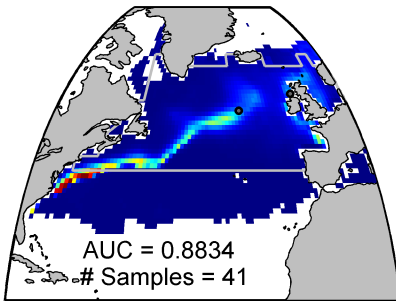

Gyrodinium spp  
Jun-Aug

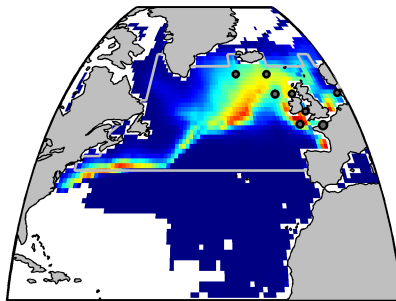

Gyrodinium spp  
Sep-Nov

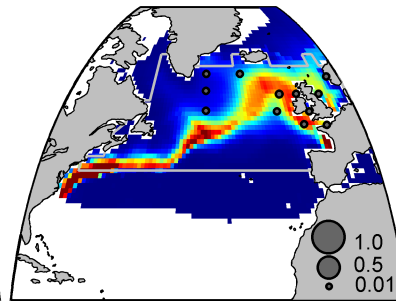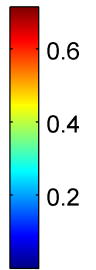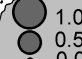

Hemiaulus spp  
Mar-May

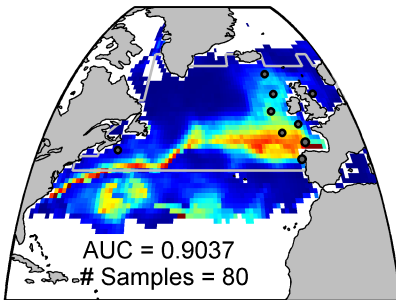

Hemiaulus spp  
Jun-Aug

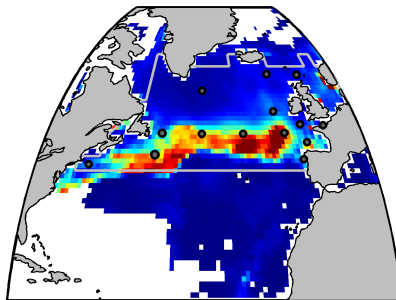

Hemiaulus spp  
Sep-Nov

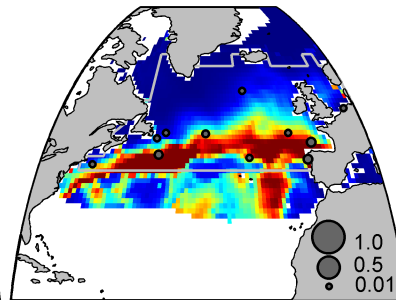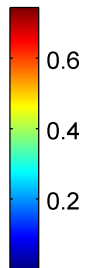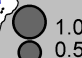



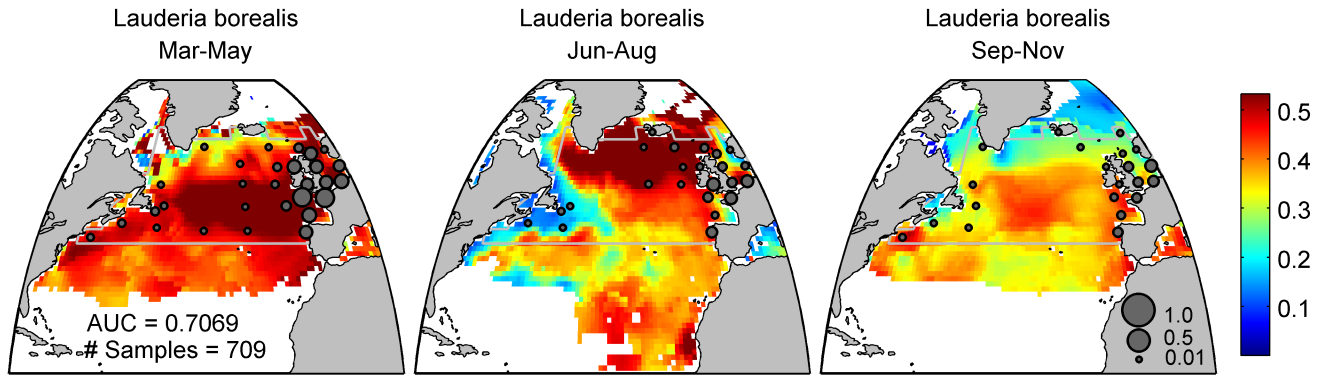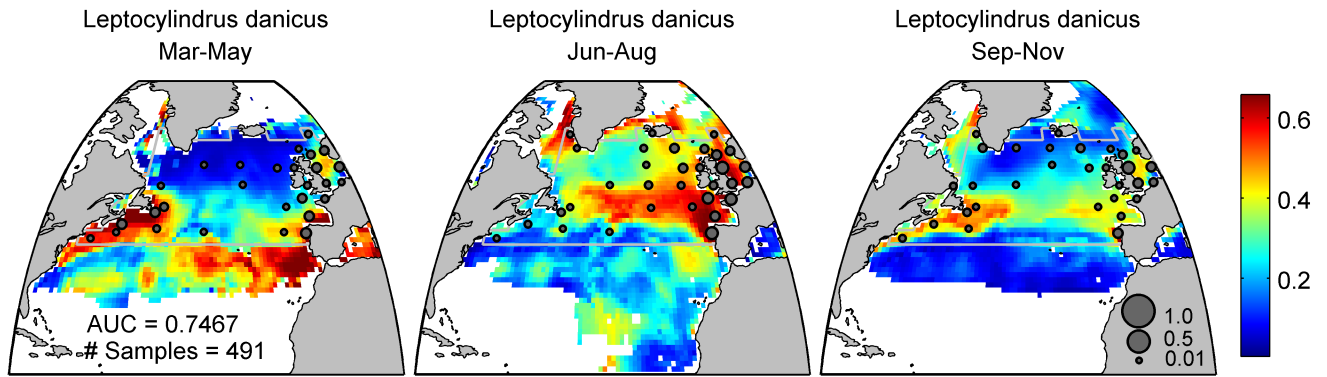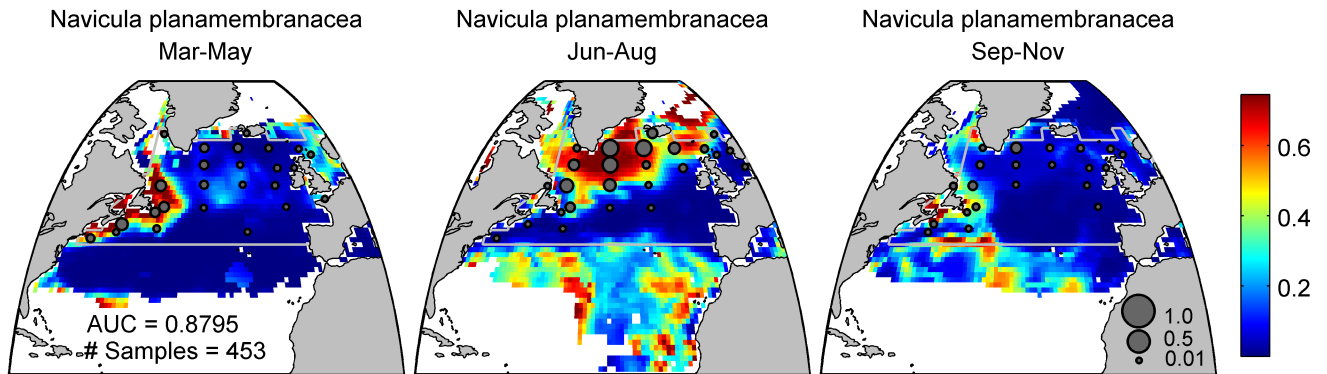

*Neodenticula seminae*  
Mar-May

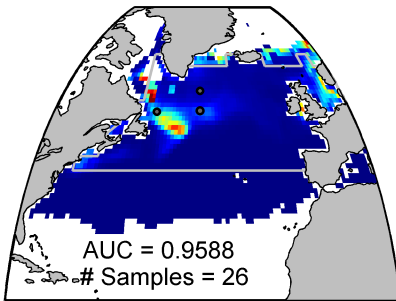

*Neodenticula seminae*  
Jun-Aug

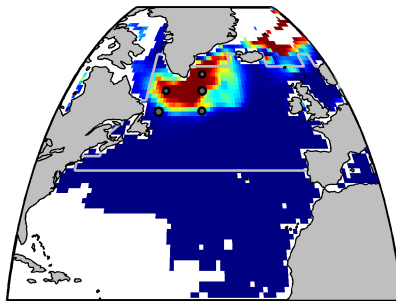

*Neodenticula seminae*  
Sep-Nov

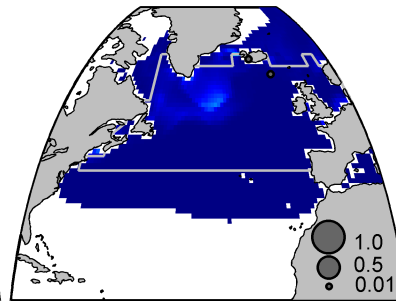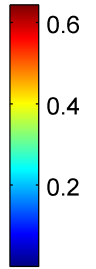

*Nitzschia longissima*  
Mar-May

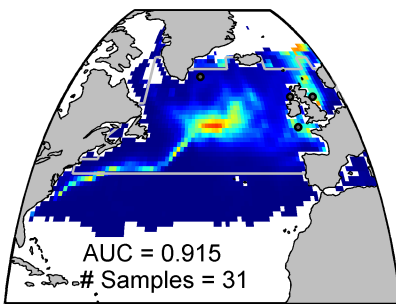

*Nitzschia longissima*  
Jun-Aug

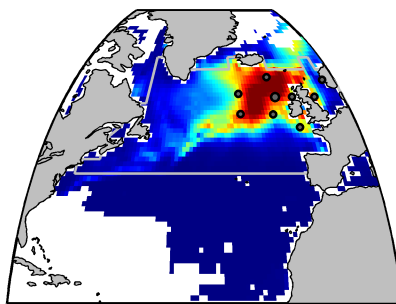

*Nitzschia longissima*  
Sep-Nov

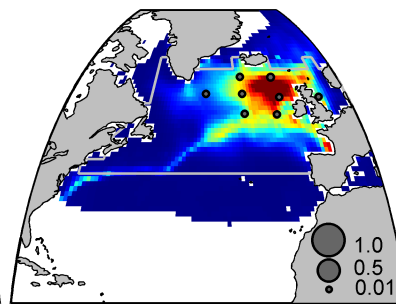

*Nitzschia sigma rigida*  
Mar-May

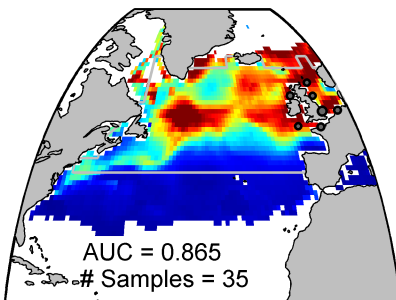

*Nitzschia sigma rigida*  
Jun-Aug

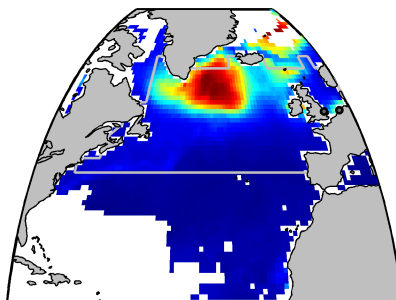

*Nitzschia sigma rigida*  
Sep-Nov

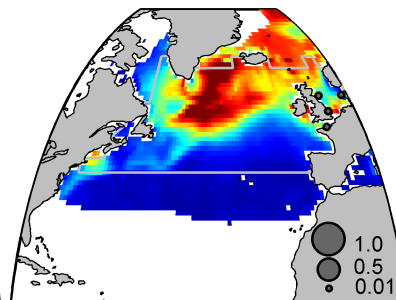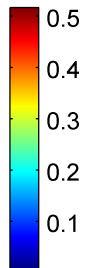

*Noctiluca scintillans*  
Mar-May

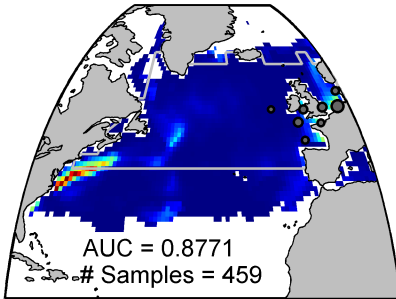

*Noctiluca scintillans*  
Jun-Aug

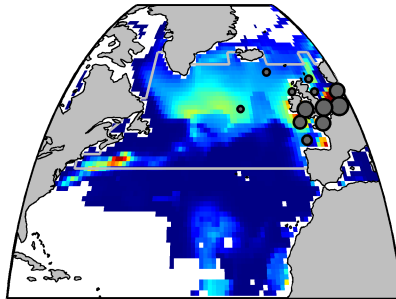

*Noctiluca scintillans*  
Sep-Nov

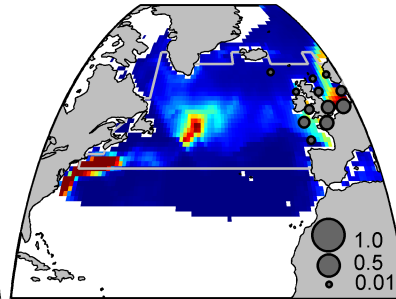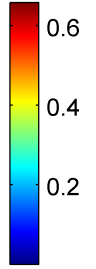

*Odontella aurita*  
Mar-May

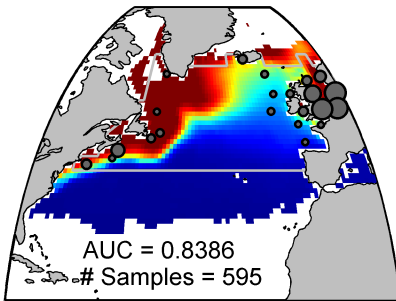

*Odontella aurita*  
Jun-Aug

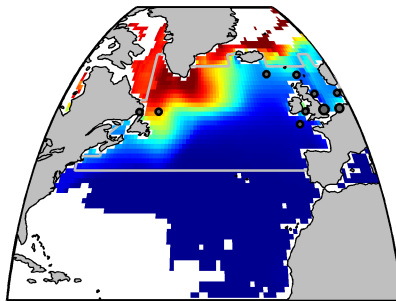

*Odontella aurita*  
Sep-Nov

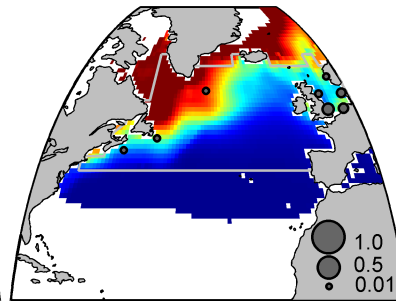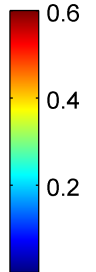

*Odontella granulata*  
Mar-May

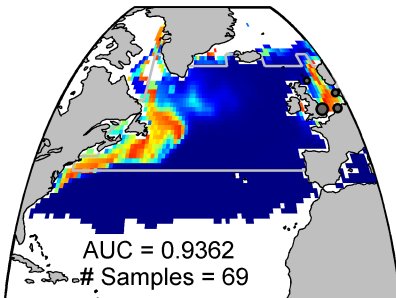

*Odontella granulata*  
Jun-Aug

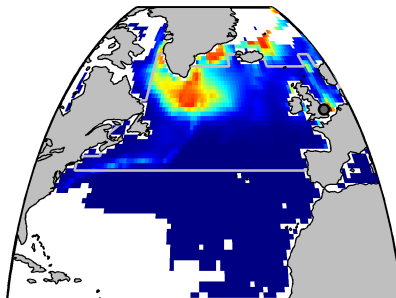

*Odontella granulata*  
Sep-Nov

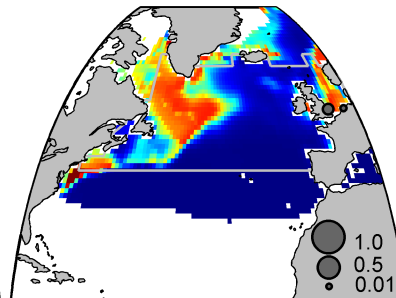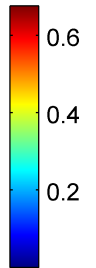

*Odontella mobiliensis*  
Mar-May

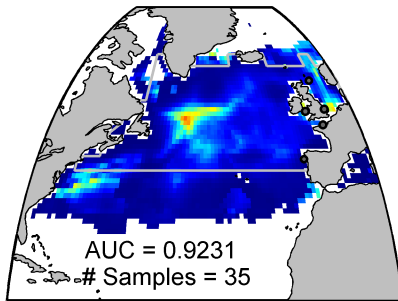

*Odontella mobiliensis*  
Jun-Aug

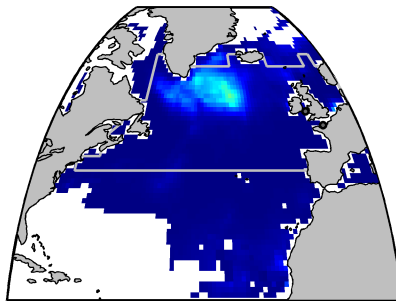

*Odontella mobiliensis*  
Sep-Nov

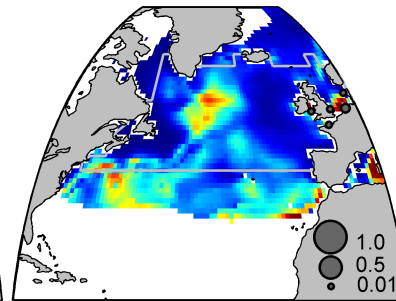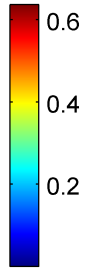

*Odontella regia*  
Mar-May

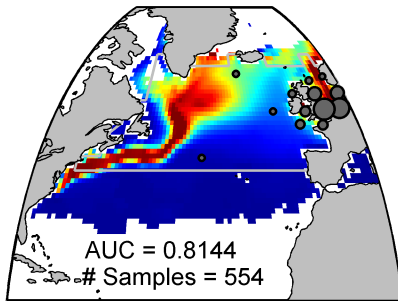

*Odontella regia*  
Jun-Aug

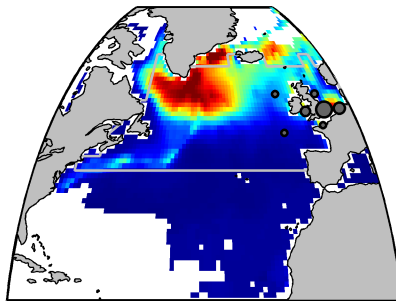

*Odontella regia*  
Sep-Nov

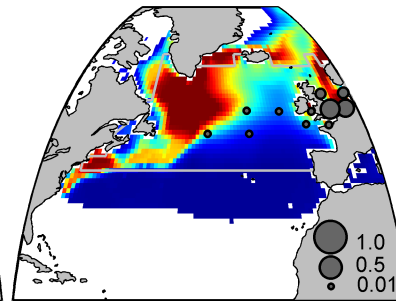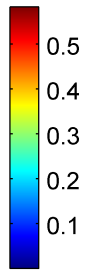

*Odontella rhombus*  
Mar-May

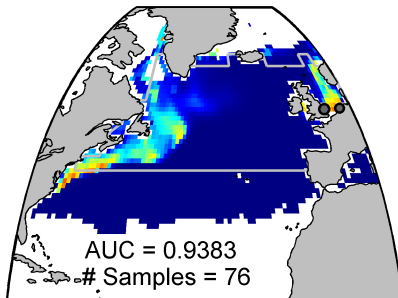

*Odontella rhombus*  
Jun-Aug

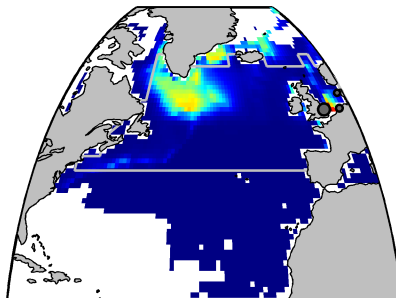

*Odontella rhombus*  
Sep-Nov

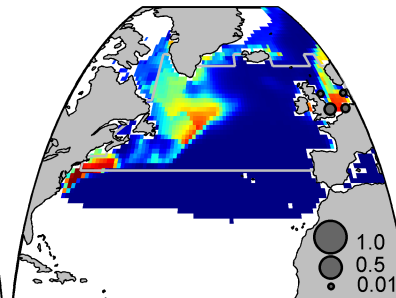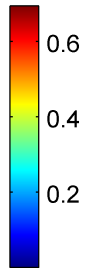

*Odontella sinensis*  
Mar-May

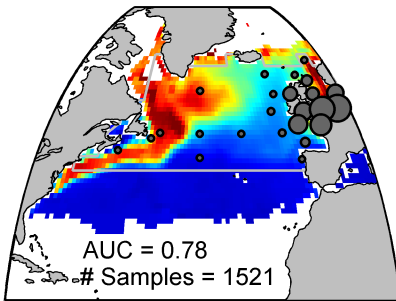

*Odontella sinensis*  
Jun-Aug

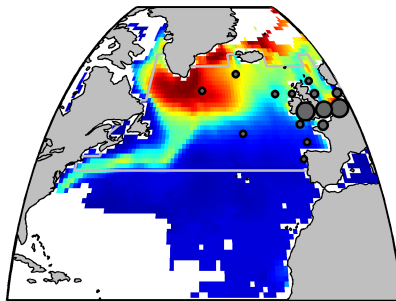

*Odontella sinensis*  
Sep-Nov

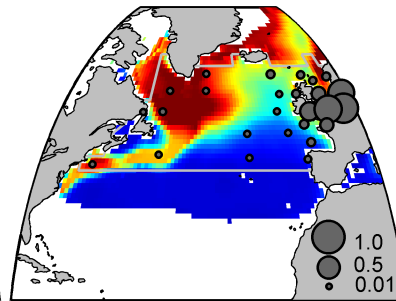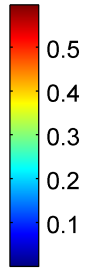

*Oxytoxum* spp  
Mar-May

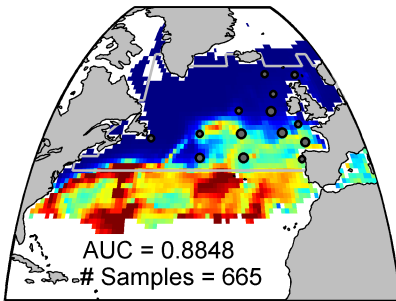

*Oxytoxum* spp  
Jun-Aug

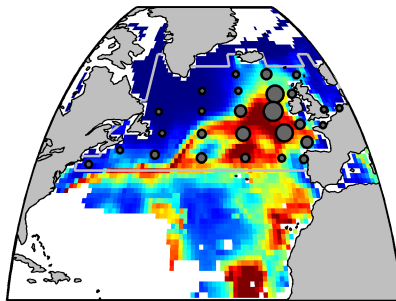

*Oxytoxum* spp  
Sep-Nov

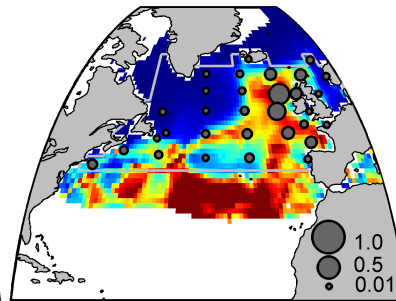

*Phalacroma* spp  
Mar-May

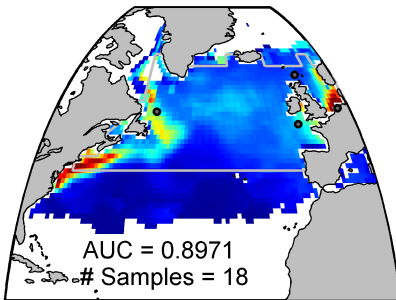

*Phalacroma* spp  
Jun-Aug

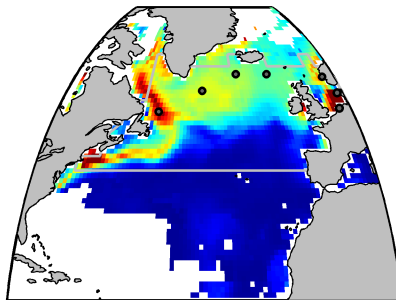

*Phalacroma* spp  
Sep-Nov

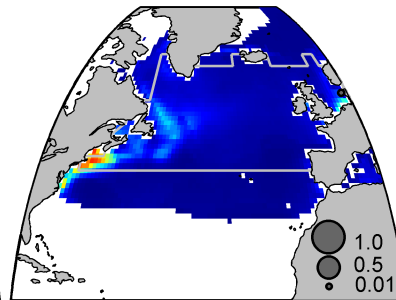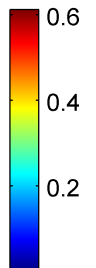

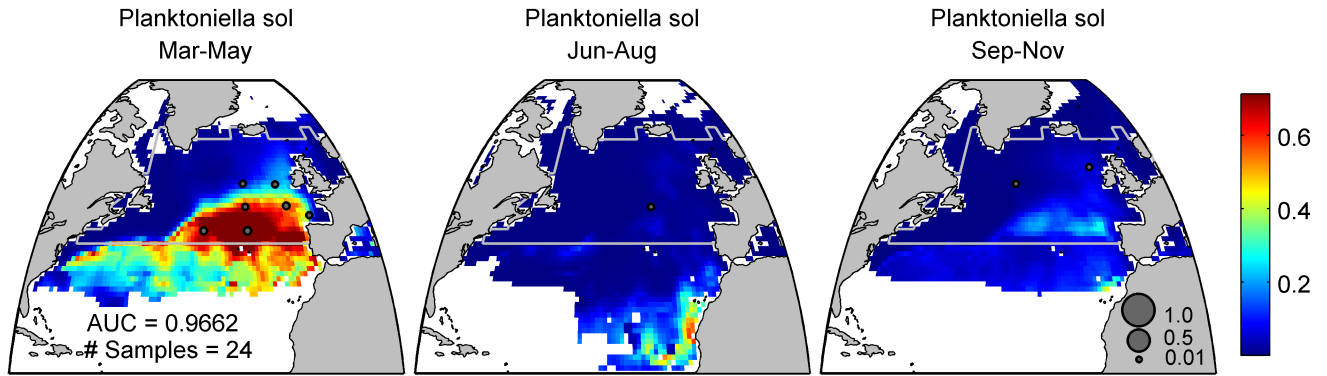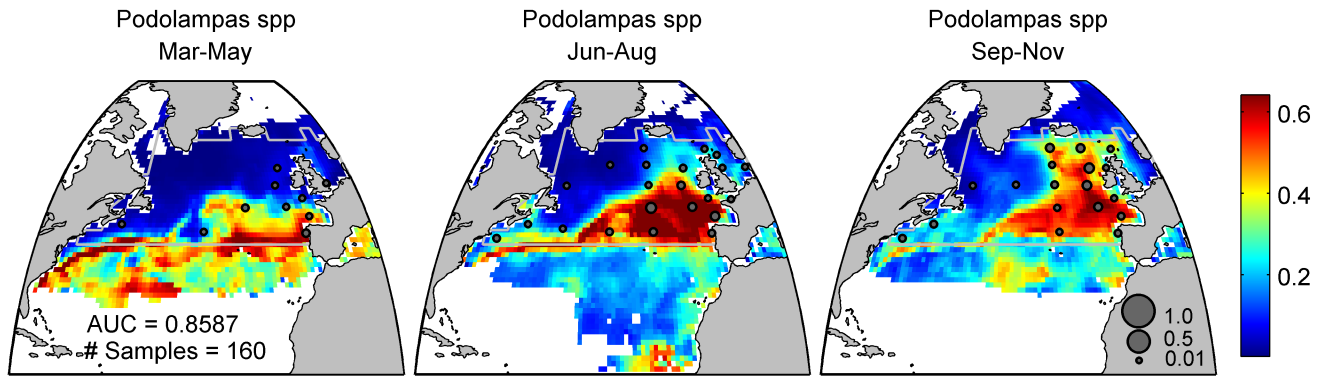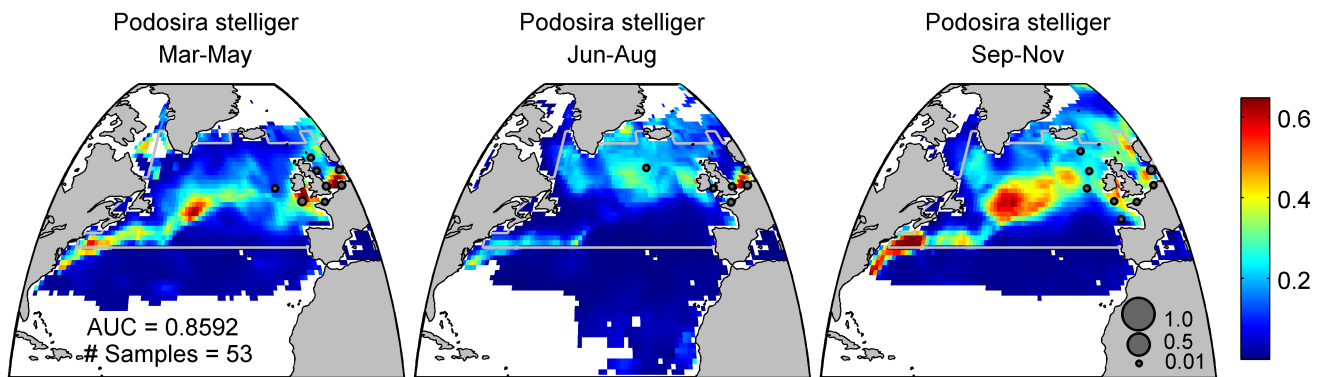

*Pronoctiluca pelagica*  
Mar-May

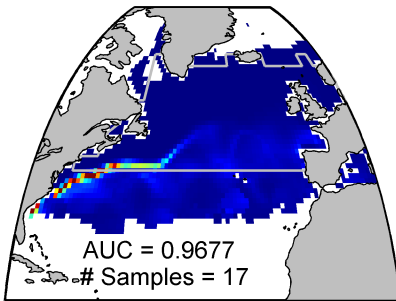

*Pronoctiluca pelagica*  
Jun-Aug

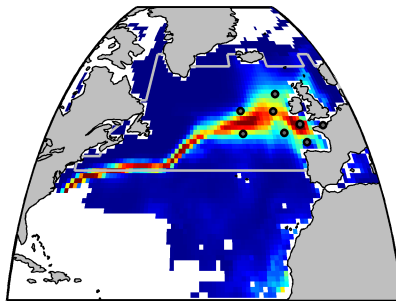

*Pronoctiluca pelagica*  
Sep-Nov

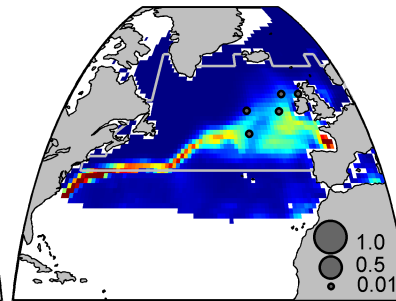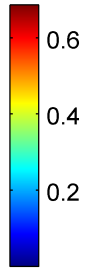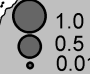

*Prorocentrum* spp  
Mar-May

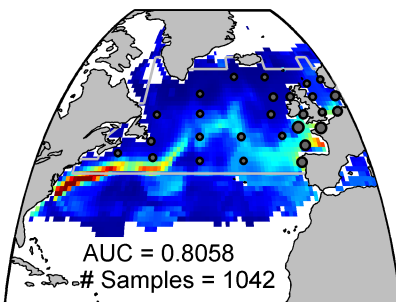

*Prorocentrum* spp  
Jun-Aug

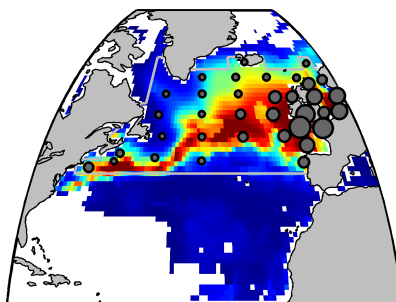

*Prorocentrum* spp  
Sep-Nov

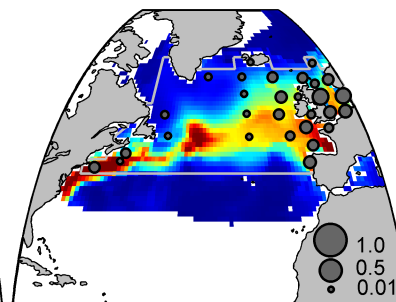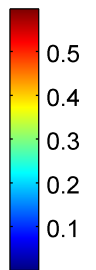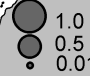

*Ptychodiscus noctiluca*  
Mar-May

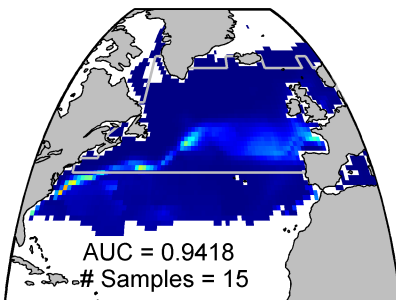

*Ptychodiscus noctiluca*  
Jun-Aug

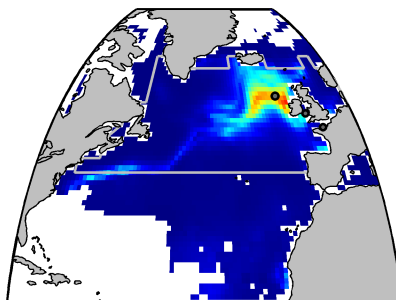

*Ptychodiscus noctiluca*  
Sep-Nov

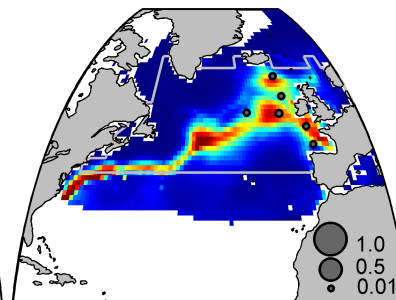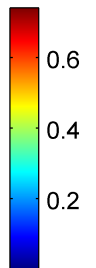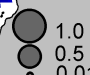

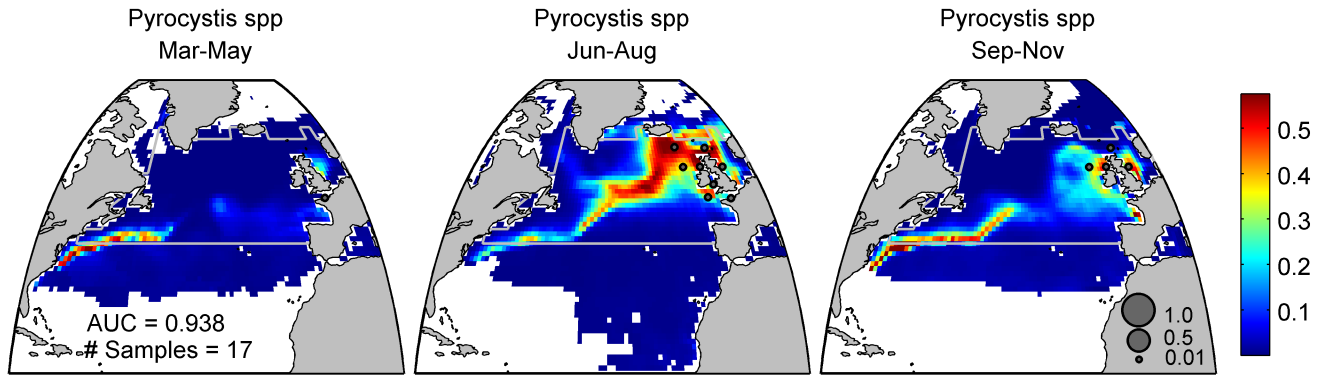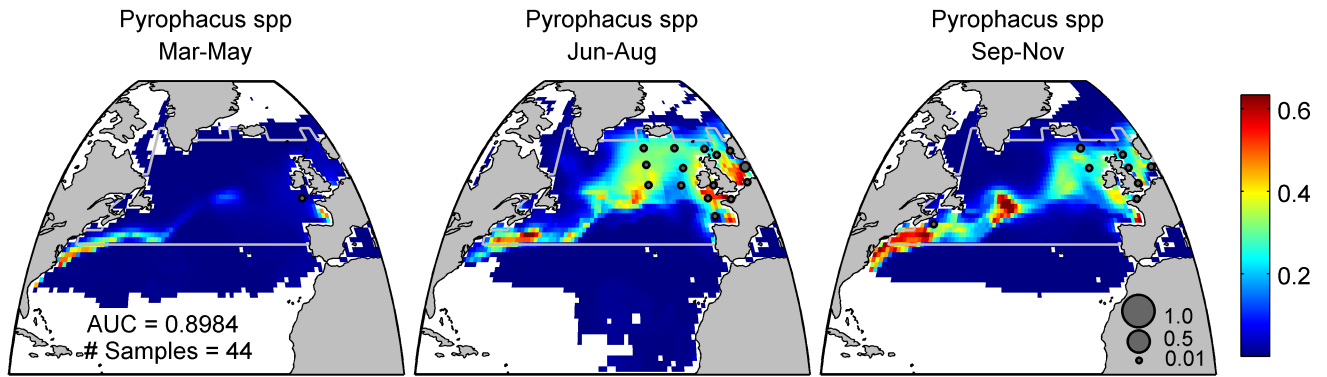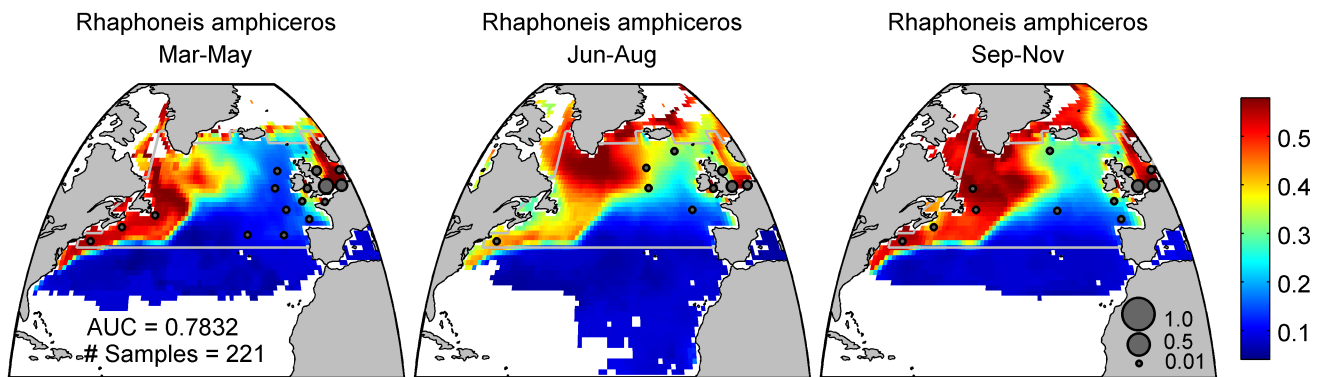



*Rhizosolenia pungens*  
Mar-May

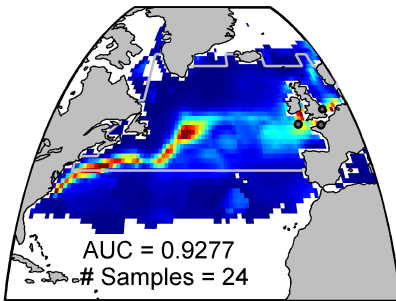

*Rhizosolenia pungens*  
Jun-Aug

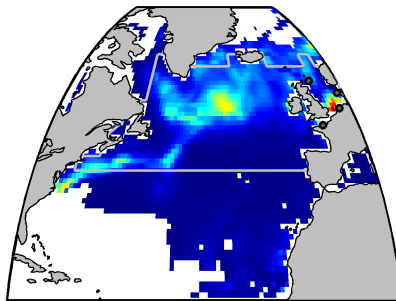

*Rhizosolenia pungens*  
Sep-Nov

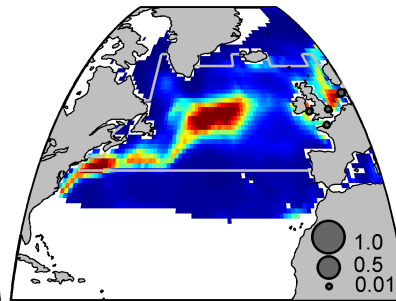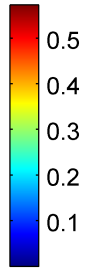

*Rhizosolenia acuminata*  
Mar-May

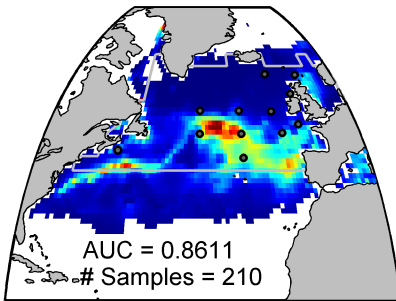

*Rhizosolenia acuminata*  
Jun-Aug

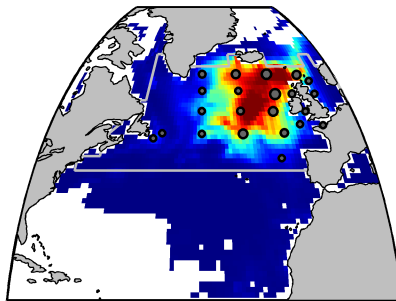

*Rhizosolenia acuminata*  
Sep-Nov

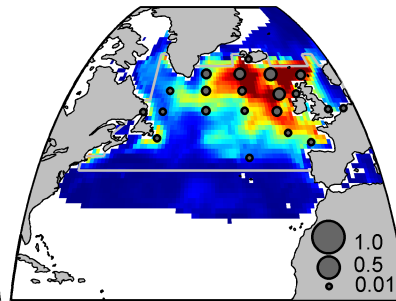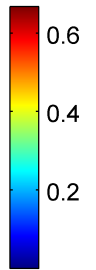

*Rhizosolenia alata curvirostris*  
Mar-May

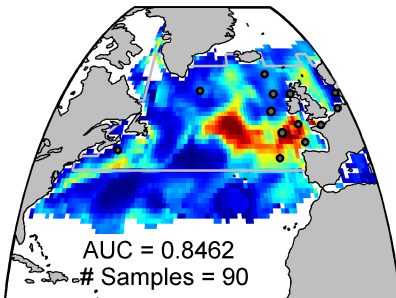

*Rhizosolenia alata curvirostris*  
Jun-Aug

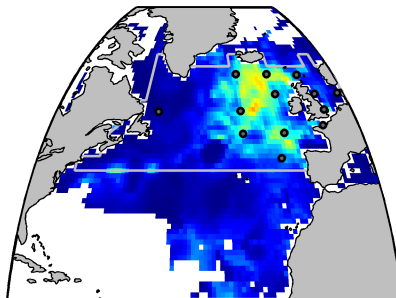

*Rhizosolenia alata curvirostris*  
Sep-Nov

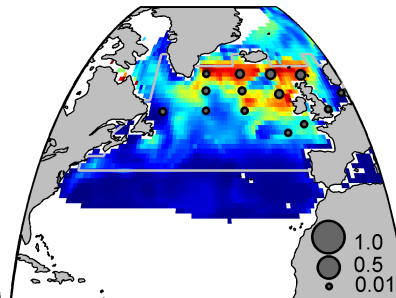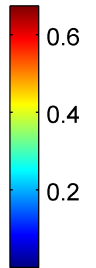

*Rhizosolenia alata indica*  
Mar-May

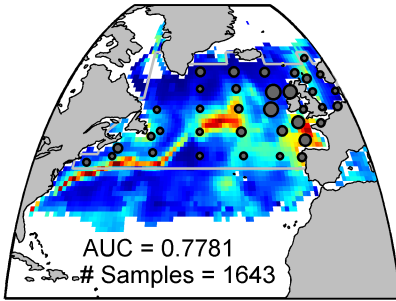

*Rhizosolenia alata indica*  
Jun-Aug

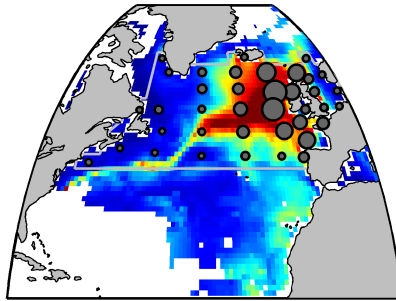

*Rhizosolenia alata indica*  
Sep-Nov

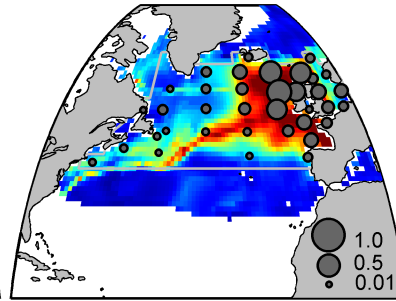

*Rhizosolenia alata inermis*  
Mar-May

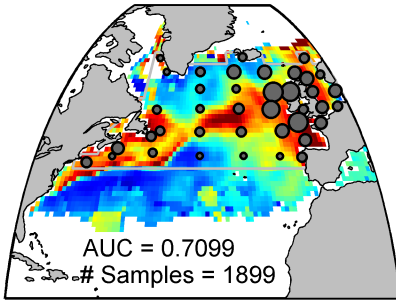

*Rhizosolenia alata inermis*  
Jun-Aug

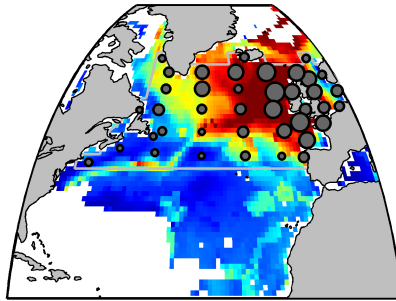

*Rhizosolenia alata inermis*  
Sep-Nov

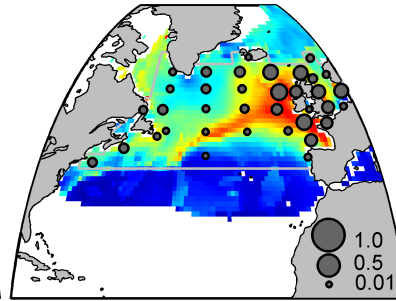

*Rhizosolenia bergonii*  
Mar-May

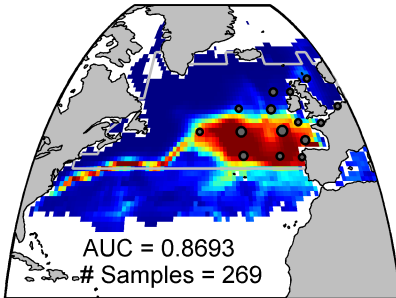

*Rhizosolenia bergonii*  
Jun-Aug

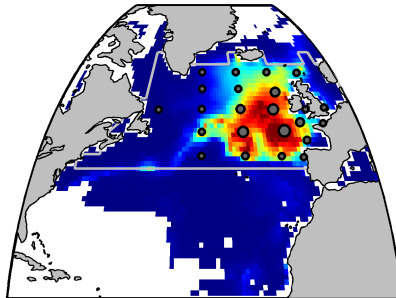

*Rhizosolenia bergonii*  
Sep-Nov

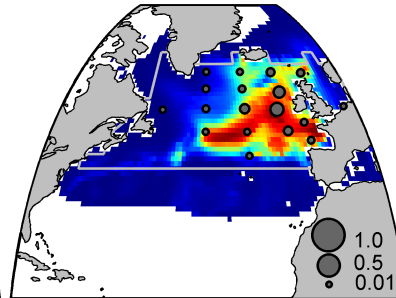

*Rhizosolenia calcar-avis*  
Mar-May

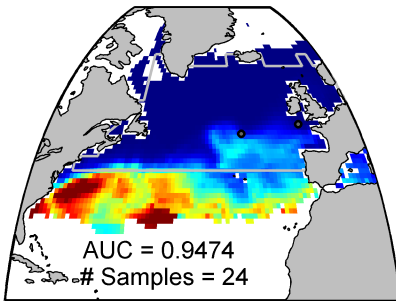

*Rhizosolenia calcar-avis*  
Jun-Aug

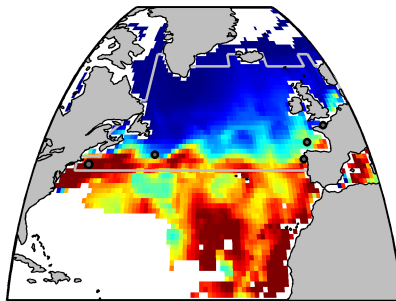

*Rhizosolenia calcar-avis*  
Sep-Nov

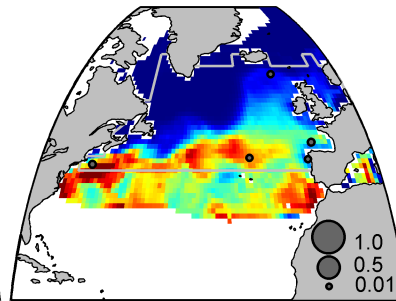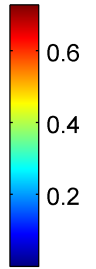

*Rhizosolenia delicatula*  
Mar-May

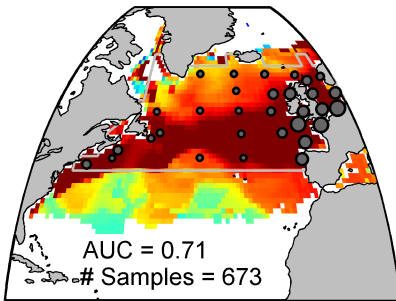

*Rhizosolenia delicatula*  
Jun-Aug

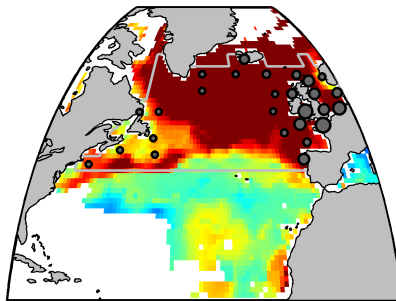

*Rhizosolenia delicatula*  
Sep-Nov

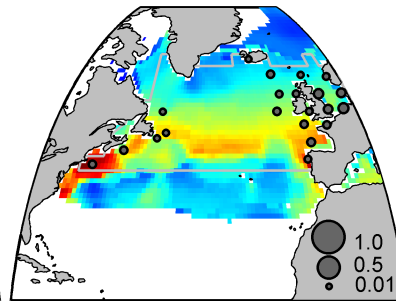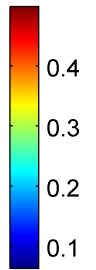

*Rhizosolenia fragilissima*  
Mar-May

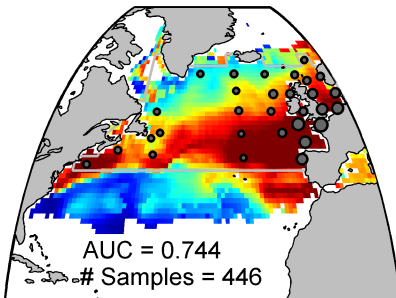

*Rhizosolenia fragilissima*  
Jun-Aug

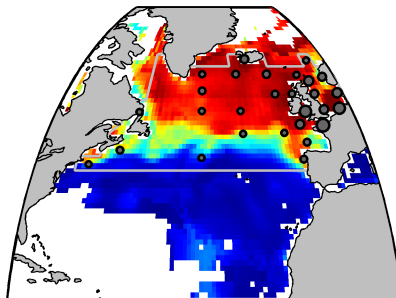

*Rhizosolenia fragilissima*  
Sep-Nov

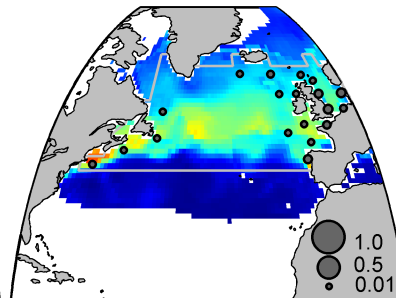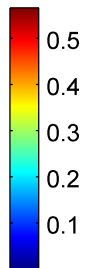

*Rhizosolenia setigera*  
Mar-May

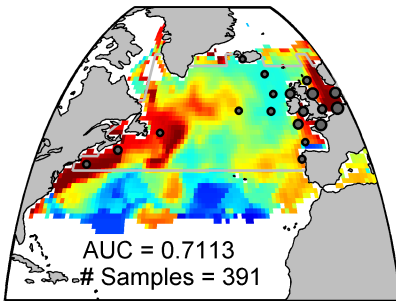

*Rhizosolenia setigera*  
Jun-Aug

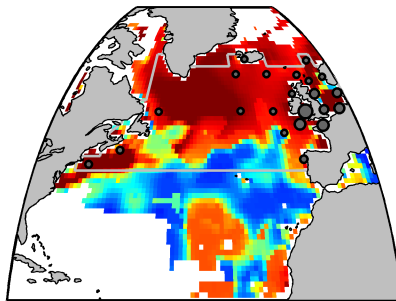

*Rhizosolenia setigera*  
Sep-Nov

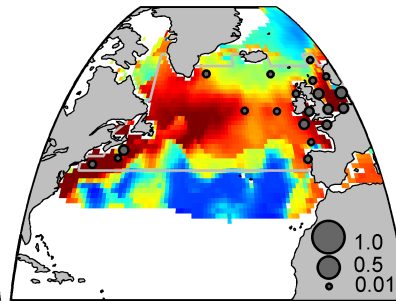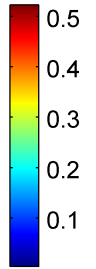

*Rhizosolenia stolterfothii*  
Mar-May

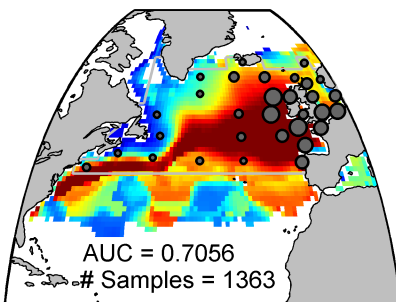

*Rhizosolenia stolterfothii*  
Jun-Aug

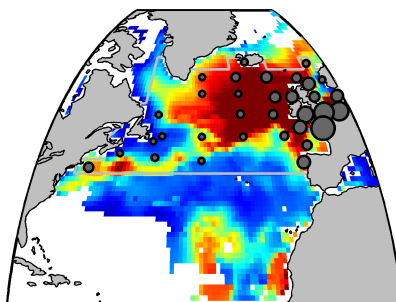

*Rhizosolenia stolterfothii*  
Sep-Nov

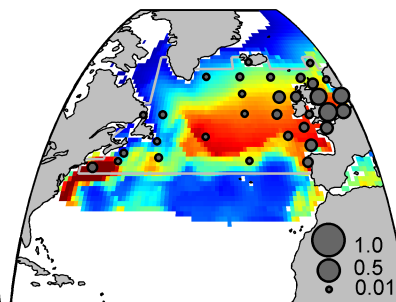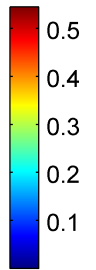

*Schroederella delicatula*  
Mar-May

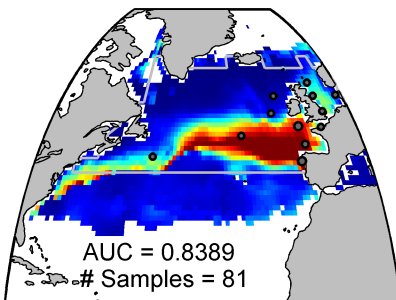

*Schroederella delicatula*  
Jun-Aug

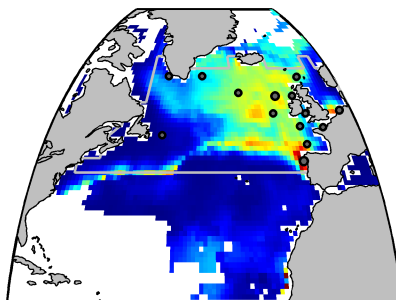

*Schroederella delicatula*  
Sep-Nov

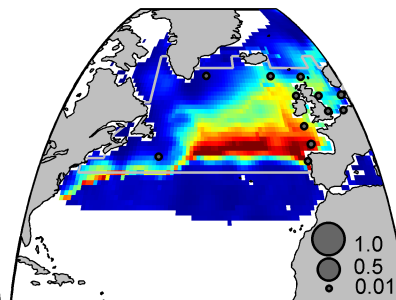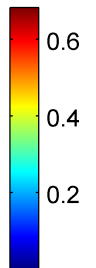

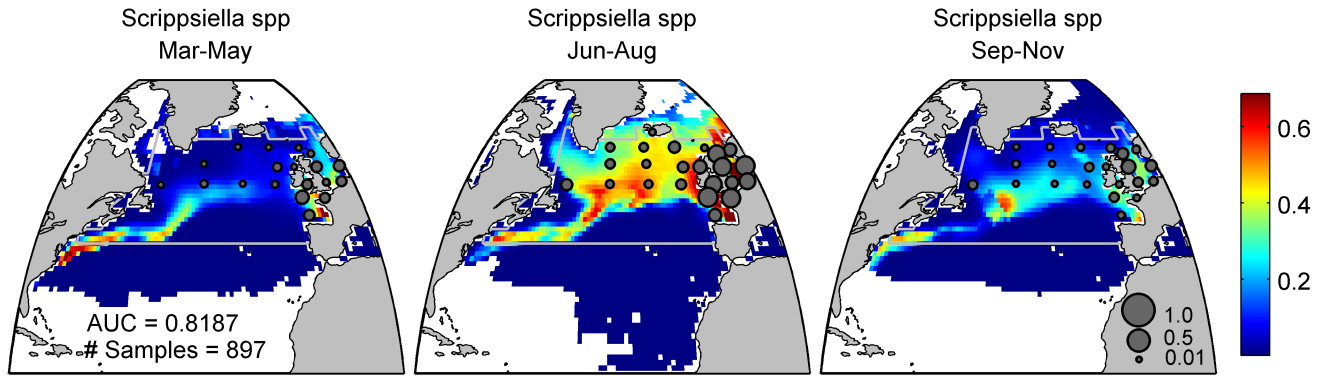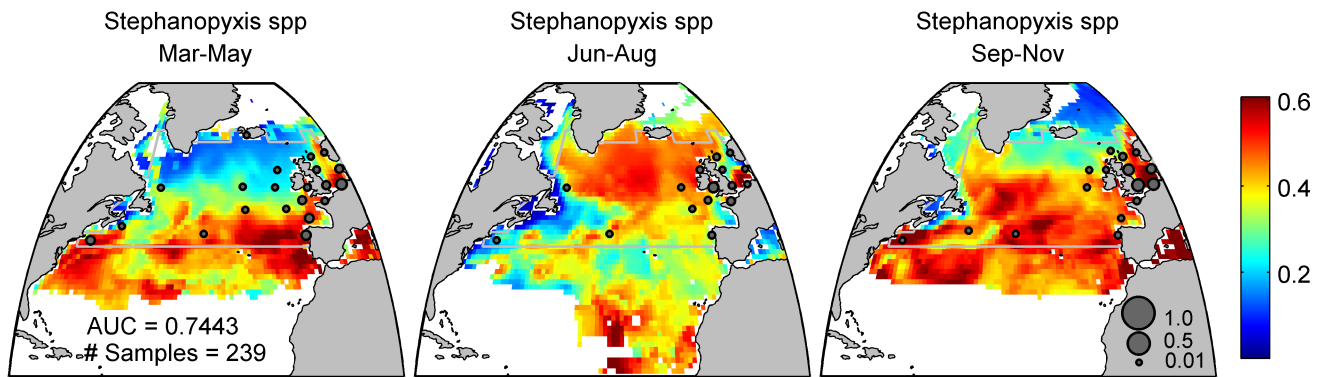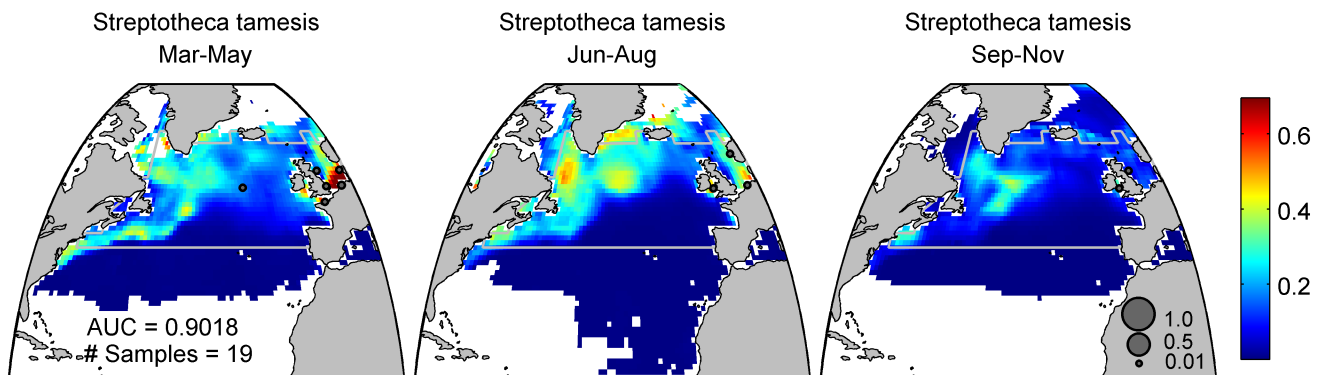

Supplement: pnas.1519080113.sfig02.pdf [file pnas.1519080113.sfig02.pdf]
