# Supplementary material
Source: PubMed Central journal article supplement (PMC4801288)

a. Historical  
1951-2000

b. Future  
2051-2100

c. Future -  
Historical

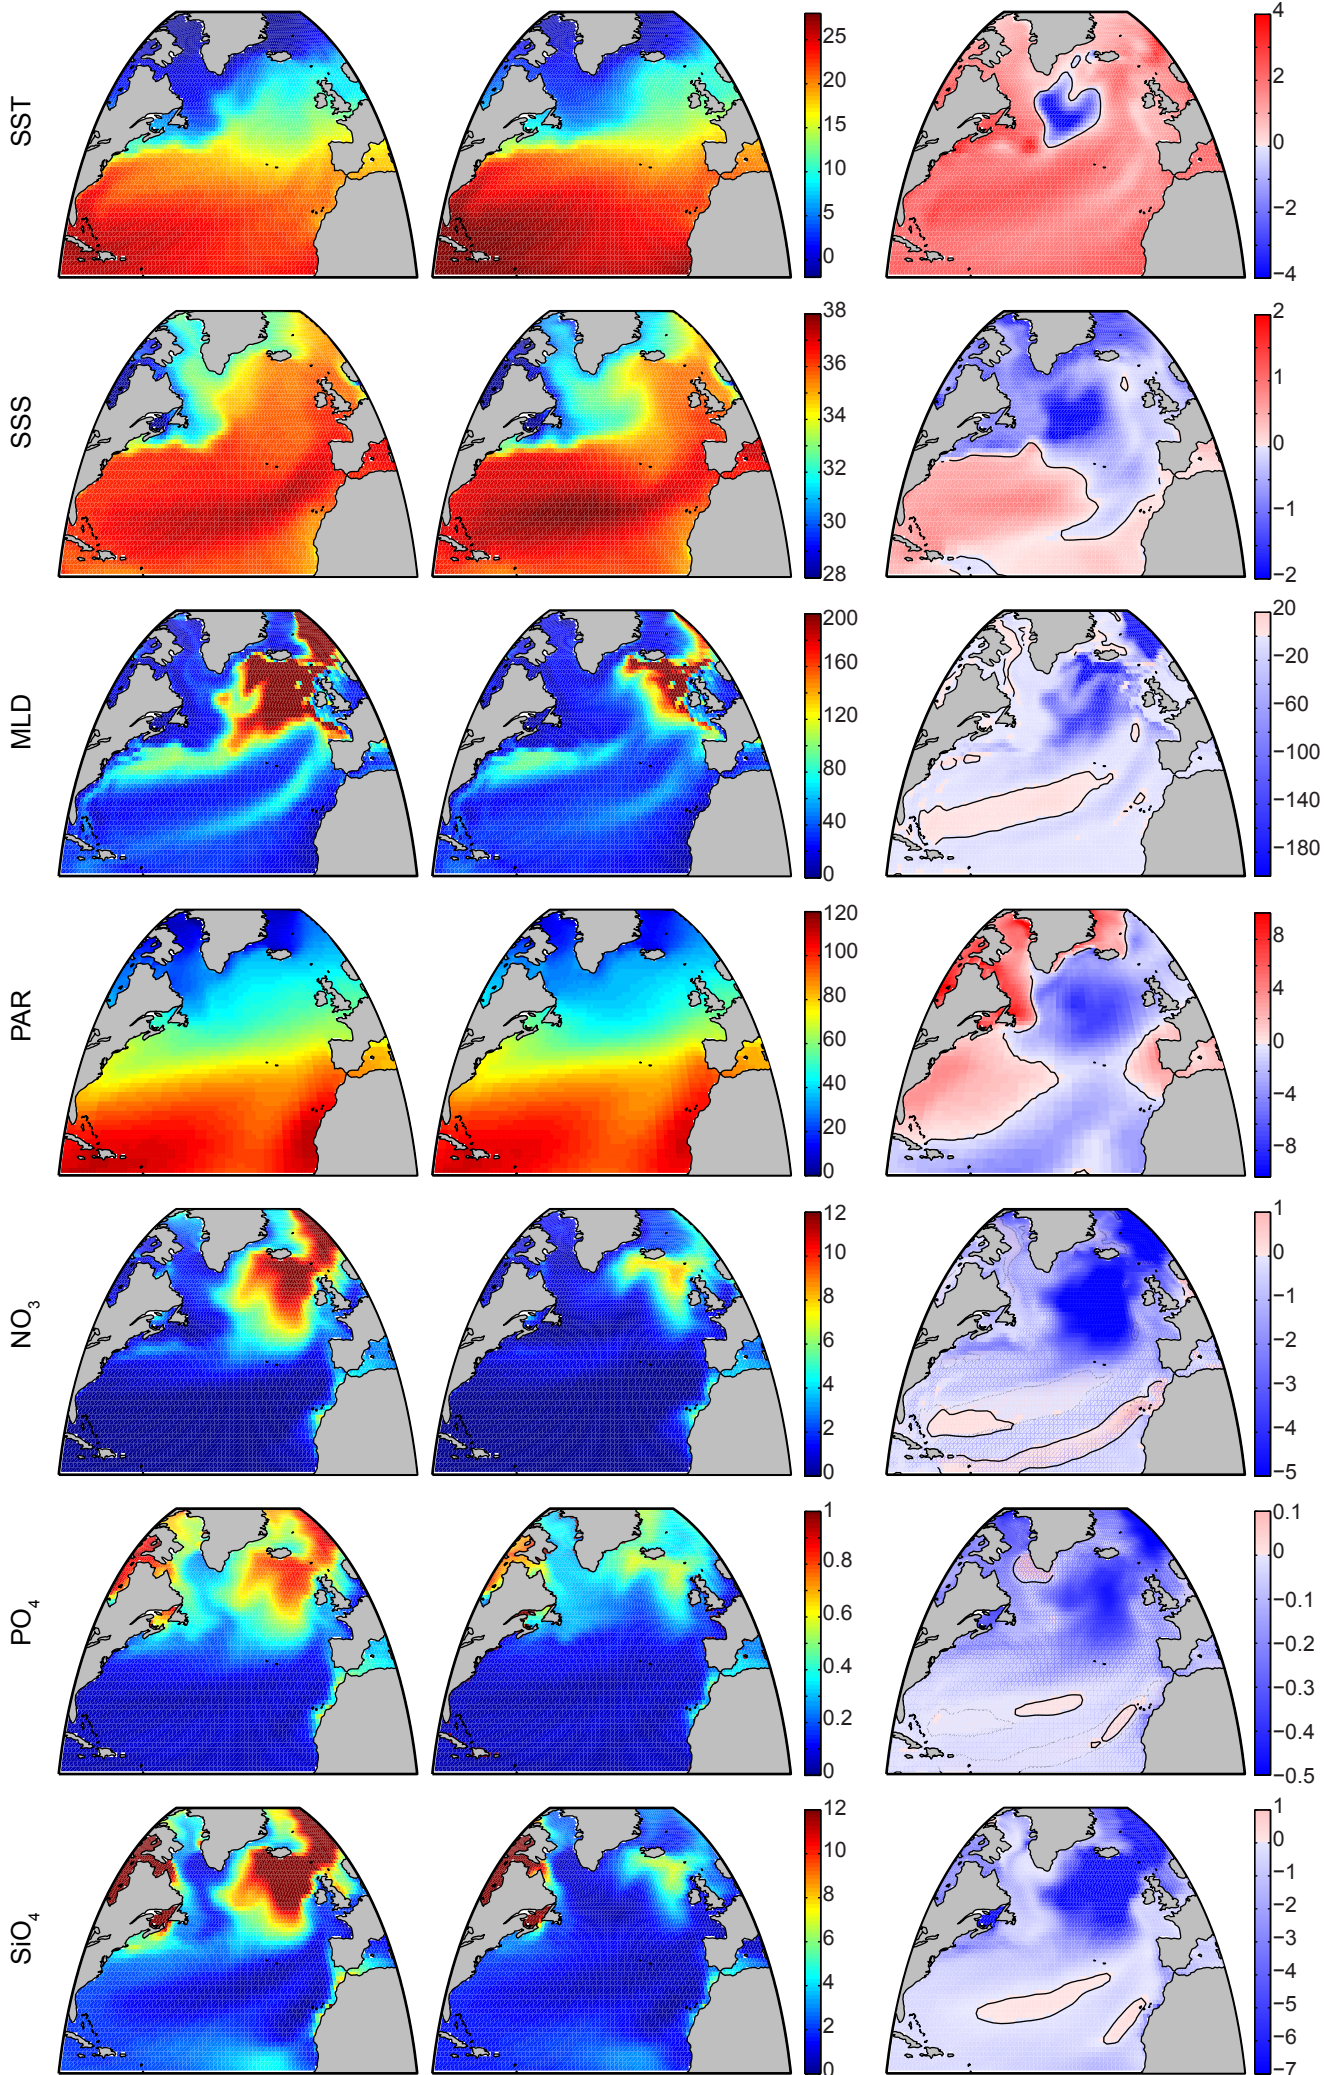

Supplement: pnas.1519080113.sfig01.pdf [file pnas.1519080113.sfig01.pdf]

a. Diatoms, arranged by range shift

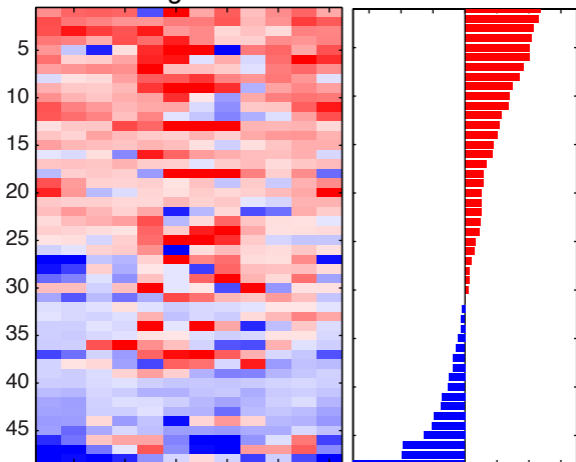

b. Dino., arranged by range shift

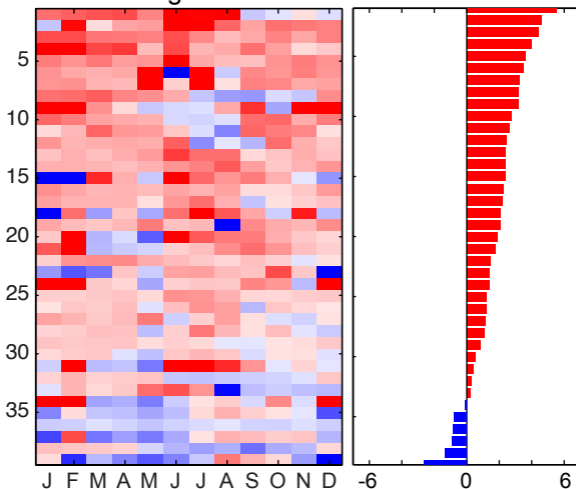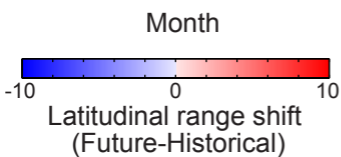

Supplement: pnas.1519080113.sfig03.pdf [file pnas.1519080113.sfig03.pdf]

a. All Taxa

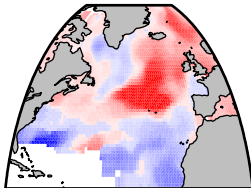

b. Diatoms

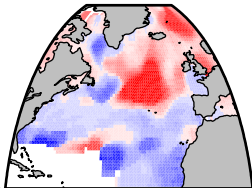

c. Dinoflagellates

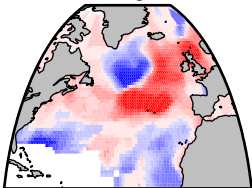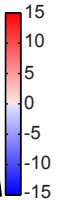

Richness change (%)  
Future - Historical

Supplement: pnas.1519080113.sfig04.pdf [file pnas.1519080113.sfig04.pdf]
